# Supplementary material for: Iron-catalyzed oxidative coupling of arylboronic acids with benzene derivatives through homolytic aromatic substitution
Source: Royal Society of Chemistry journal article supplement (doi:10.1039/c1cc14694g), 2011-01-01
Supplement: c1cc14694g.pdf [file c1cc14694g.pdf]

**Supporting Information for**  
**Iron-catalyzed oxidative coupling of arylboronic acids with benzene derivatives**  
**through homolytic aromatic substitution mechanism**

Nanase Uchiyama, Eiji Shirakawa,\* Ryo Nishikawa, and Tamio Hayashi\*

Table of Contents

|                                            |        |
|--------------------------------------------|--------|
| General Remarks                            | S2     |
| Preparation of Ligand L3                   | S2     |
| General Procedure for Table 1              | S2–S3  |
| General Procedure for Table 2 and Scheme 1 | S3     |
| Spectrum Data of the Products              | S3–S5  |
| ICP Analysis of Fe(OTf) <sub>3</sub>       | S5     |
| Procedure for Scheme 2                     | S6     |
| General Procedure for Scheme 3             | S6     |
| References                                 | S6     |
| NMR Spectra of the Products                | S7–S28 |

**General Remarks.** All manipulations of oxygen- and moisture-sensitive materials were conducted with a standard Schlenk technique under a nitrogen atmosphere. Nuclear magnetic resonance spectra were taken on a JEOL JNM LA500 spectrometer ( $^1\text{H}$ , 500 MHz) or a JEOL JNM LA600 spectrometer ( $^{13}\text{C}$ , 150 MHz) using tetramethylsilane ( $^1\text{H}$  and  $^{13}\text{C}$ ) as an internal standard. GC spectra were taken on Shimadzu GC-18A. GC-MS spectra were taken on Shimadzu GCMS-QP5050A. High-resolution mass spectra were obtained with a Bruker Daltonics microTOF-Q spectrometer (ESI). Di-*tert*-butyl hyponitrite was prepared according to a literature procedure.<sup>1</sup> Unless otherwise noted, reagents were commercially available and used without further purification.  $^1\text{H}$  NMR analysis using *p*-dimethoxybenzene as an internal standard showed that arylboronic acids used are free from the corresponding boroxines in DMSO- $d_6$  and the molar amounts of the arylboron moieties are within a margin of error of plus or minus 5% compared with those calculated on the assumption that the arylboronic acids are pure.

**Preparation of 4,7-Bis[4-(trifluoromethyl)phenyl]-1,10-phenanthroline (L3).** The title compound was prepared according to a literature method for the coupling of 4,7-dibromo-1,10-phenanthroline with 4-methoxy-3,5-dimethylphenylzinc chloride with a slight modification.<sup>2</sup> To a solution of 1-bromo-4-(trifluoromethyl)benzene (339 mg, 1.50 mmol) in THF (10 mL) at  $-78\text{ }^\circ\text{C}$  was added *n*-BuLi (0.94 mL, 1.6 M solution in hexane, 1.5 mmol). To this mixture was added at  $-78\text{ }^\circ\text{C}$  a solution of  $\text{ZnCl}_2$  (204 mg, 1.50 mmol) in THF (5 mL), cooled by ice bath, via cannula. It was allowed to warm to room temperature and a suspension of 4,7-dichloro-1,10-phenanthroline (125 mg, 0.500 mmol) and  $\text{Pd}(\text{PPh}_3)_4$  (28.9 mg, 0.0250 mmol) in THF (10 mL) was added to the organozinc intermediate using a large gauge cannula. The mixture was heated at reflux for 12 h, cooled to room temperature, quenched with sat.  $\text{NH}_4\text{Cl}$  aq. (15 mL), and neutralized with sat.  $\text{NaHCO}_3$  aq. (30 mL). After extraction with EtOAc (30 mL x 3) and washing with brine, the organic layer was dried over  $\text{MgSO}_4$  and concentrated. The residue was subjected to  $\text{SiO}_2$  column chromatography (EtOAc then  $\text{CH}_2\text{Cl}_2/\text{MeOH}/\text{NH}_3$  aq. = 93/5/2) to give 4,7-bis[4-(trifluoromethyl)phenyl]-1,10-phenanthroline (L3: 161 mg, 59% yield).

**4,7-Bis[4-(trifluoromethyl)phenyl]-1,10-phenanthroline (L3).**

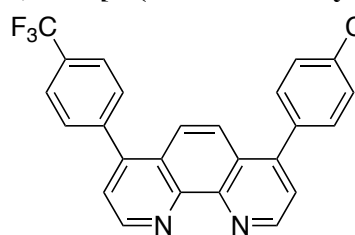

A white solid.  $^1\text{H}$  NMR (500 MHz,  $\text{CDCl}_3$ )  $\delta$  7.61 (d,  $J = 4.4$  Hz, 2 H), 7.66 (d,  $J = 8.3$  Hz, 4 H), 7.78 (s, 2 H), 7.82 (d,  $J = 8.3$  Hz, 4 H), 9.30 (d,  $J = 4.4$  Hz, 2 H).  $^{13}\text{C}$  NMR (150 MHz,  $\text{CDCl}_3$ )  $\delta$  123.6, 124.03, 124.04 (q,  $J = 274$  Hz), 125.8 (q,  $J = 2.9$  Hz), 126.2, 130.1, 130.9 (q,  $J = 32$  Hz), 141.5, 146.9, 147.0, 150.1. HRMS (ESI) Calcd for  $\text{C}_{26}\text{H}_{14}\text{F}_6\text{N}_2$ :  $[\text{M}+\text{Na}]^+$ , 491.0959.

Found:  $m/z$  491.0962.

**Iron-Catalyzed Oxidative Coupling of 4-Bromophenylboronic Acid with Benzene (Table 1): General Procedure.** To a partial suspension of an iron complex (0.0120 mmol) and 4-bromophenylboronic acid (**1a**: 24.1 mg, 0.120 mmol) in benzene (**2o**: 1.07 mL, 12.0 mmol) in a 20 mL Schlenk tube was added a ligand (0.012 mmol) and *t*-BuOO*t*-Bu (**3**: 44.0  $\mu\text{L}$ , 0.240 mmol). After stirring at  $80\text{ }^\circ\text{C}$  for the time specified in Table 1, nonane as an internal standard was added. An aliquot of the solution was subjected to GC analysis. The rest of the solution was poured into brine (20 mL) and extracted with  $\text{Et}_2\text{O}$  (25 mL x 3). The organic layer was dried over  $\text{MgSO}_4$ , filtered, and concentrated. The residue was subjected to  $^1\text{H}$  NMR

analysis using MeNO<sub>2</sub> as an internal standard.

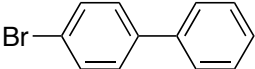 **4-Bromobiphenyl (4ao).**<sup>3</sup> A white solid. <sup>1</sup>H NMR (500 MHz, CDCl<sub>3</sub>) δ 7.37 (t, *J* = 6.9 Hz, 1 H), 7.44 (t, *J* = 7.6 Hz, 2 H), 7.46 (d, *J* = 8.5 Hz, 2 H), 7.55 (d, *J* = 7.6 Hz, 2 H), 7.57 (d, *J* = 8.5 Hz, 2 H).

**Iron-Catalyzed Oxidative Coupling of Arylboronic Acids with Arenes (Table 2 and Scheme 1). General Procedure.** To a partial suspension of Fe(OTf)<sub>3</sub> (10.1 mg, 0.0200 mmol), 4,7-bis[4-(trifluoromethyl)phenyl]-1,10-phenanthroline (**L3**: 9.4 mg, 0.020 mmol) and an arylboronic acid (**1**: 0.200 mmol) in an arene (**2**: 20.0 mmol) in a 20 mL Schlenk tube was added *t*-BuOO*t*-Bu (**3**: 73.0 μL, 0.400 mmol). After stirring at 80 °C for the time specified in Table 2 or Scheme 1, the resulting solution was poured into brine (20 mL) and extracted with Et<sub>2</sub>O (25 mL x 3). The organic layer was dried over MgSO<sub>4</sub>, filtered, and concentrated. The residue was subjected to SiO<sub>2</sub> chromatography (PTLC) to give the corresponding coupling product (**4**).

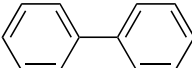 **Biphenyl (4bo).**<sup>4</sup> A white solid. <sup>1</sup>H NMR (500 MHz, CDCl<sub>3</sub>) δ 7.35 (t, *J* = 7.6 Hz, 2 H), 7.44 (t, *J* = 7.6 Hz, 4 H), 7.60 (d, *J* = 8.4 Hz, 4 H).

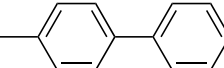 **4-Methylbiphenyl (4co).**<sup>5</sup> A white solid. <sup>1</sup>H NMR (500 MHz, CDCl<sub>3</sub>) δ 2.40 (s, 3 H), 7.25 (d, *J* = 8.2 Hz, 2 H), 7.32 (t, *J* = 7.4 Hz, 1 H), 7.42 (t, *J* = 7.7 Hz, 2 H), 7.50 (d, *J* = 8.2 Hz, 2 H), 7.59 (d, *J* = 7.2 Hz, 2 H).

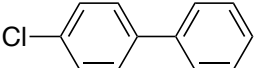 **4-Chlorobiphenyl (4do).**<sup>6</sup> A white solid. <sup>1</sup>H NMR (500 MHz, CDCl<sub>3</sub>) δ 7.36 (t, *J* = 7.7 Hz, 1 H), 7.41 (d, *J* = 8.5 Hz, 2 H), 7.44 (t, *J* = 7.8 Hz, 2 H), 7.52 (d, *J* = 8.5 Hz, 2 H), 7.55 (d, *J* = 7.2 Hz, 2 H).

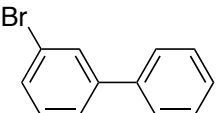 **3-Bromobiphenyl (4eo).**<sup>7</sup> A colorless oil. <sup>1</sup>H NMR (500 MHz, CDCl<sub>3</sub>) δ 7.31 (t, *J* = 7.9 Hz, 1 H), 7.38 (t, *J* = 7.4 Hz, 1 H), 7.45 (t, *J* = 7.9 Hz, 2 H), 7.46–7.50 (m, 1 H), 7.52 (d, *J* = 7.7 Hz, 1 H), 7.56 (d, *J* = 7.1 Hz, 2 H), 7.74 (t, *J* = 1.8 Hz, 1 H).

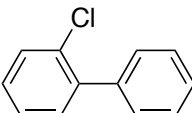 **2-Chlorobiphenyl (4fo).**<sup>8</sup> A pale yellow oil. <sup>1</sup>H NMR (500 MHz, CDCl<sub>3</sub>) δ 7.26–7.42 (m, 4 H), 7.42–7.46 (m, 4 H), 7.48 (dd, *J* = 7.6, 1.5 Hz, 1 H).

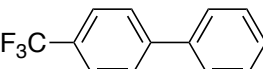 **4-(Trifluoromethyl)biphenyl (4go).**<sup>9</sup> A white solid. <sup>1</sup>H NMR (500 MHz, CDCl<sub>3</sub>) δ 7.41 (t, *J* = 7.4 Hz, 1 H), 7.48 (t, *J* = 7.6 Hz, 2 H), 7.60 (d, *J* = 7.4 Hz, 2 H), 7.70 (s, 4 H).

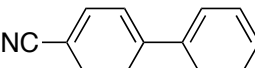 **4-Cyanobiphenyl (4ho).**<sup>10</sup> A white solid. <sup>1</sup>H NMR (500 MHz, CDCl<sub>3</sub>) δ 7.43 (t, *J* = 7.3 Hz, 1 H), 7.49 (t, *J* = 7.5 Hz, 2 H), 7.59 (d, *J* = 7.1 Hz, 2 H), 7.69 (d, *J* = 8.2 Hz, 2 H), 7.73 (d, *J* = 8.2 Hz, 2 H).

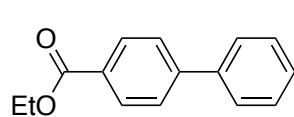

**4-Ethoxycarbonylbiphenyl (4io).**<sup>11</sup> A white solid. <sup>1</sup>H NMR (500 MHz, CDCl<sub>3</sub>) δ 1.42 (t, *J* = 7.1 Hz, 3 H), 4.41 (q, *J* = 7.1 Hz, 2 H), 7.39 (t, *J* = 7.4 Hz, 1 H), 7.47 (t, *J* = 7.6 Hz, 2 H), 7.63 (d, *J* = 7.2 Hz, 2 H), 7.66 (d, *J* = 8.2 Hz, 2 H), 8.12 (d, *J* = 8.2 Hz, 2 H).

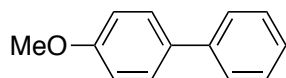

**4-Methoxybiphenyl (4jo).**<sup>4</sup> A white solid. <sup>1</sup>H NMR (500 MHz, CDCl<sub>3</sub>) δ 3.86 (s, 3 H), 6.98 (d, *J* = 8.4 Hz, 2 H), 7.30 (t, *J* = 7.4 Hz, 1 H), 7.42 (t, *J* = 7.6 Hz, 2 H), 7.53 (d, *J* = 8.4 Hz, 2 H), 7.55 (d, *J* = 7.2 Hz, 2 H).

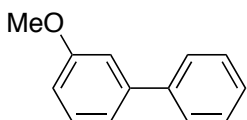

**3-Methoxybiphenyl (4ko).**<sup>4</sup> A colorless oil. <sup>1</sup>H NMR (500 MHz, CDCl<sub>3</sub>) δ 3.87 (s, 3 H), 6.91 (dd, *J* = 8.2, 2.6 Hz, 1 H), 7.14 (t, *J* = 2.0 Hz, 1 H), 7.19 (d, *J* = 7.6 Hz, 1 H), 7.33–7.38 (m, 2 H), 7.44 (t, *J* = 7.8 Hz, 2 H), 7.59 (d, *J* = 7.2 Hz, 2 H).

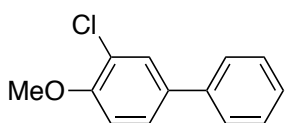

**3-Chloro-4-methoxybiphenyl (4lo).**<sup>12</sup> A white solid. <sup>1</sup>H NMR (500 MHz, CDCl<sub>3</sub>) δ 3.95 (s, 3 H), 7.00 (d, *J* = 8.6 Hz, 1 H), 7.33 (t, *J* = 7.4 Hz, 1 H), 7.42 (t, *J* = 7.8 Hz, 2 H), 7.45 (dd, *J* = 8.6, 2.3 Hz, 1 H), 7.53 (d, *J* = 7.1 Hz, 2 H), 7.62 (d, *J* = 2.3 Hz, 1 H).

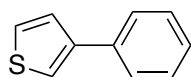

**3-Phenylthiophene (4mo).**<sup>13</sup> A white solid. <sup>1</sup>H NMR (500 MHz, CDCl<sub>3</sub>) δ 7.30 (t, *J* = 7.4 Hz, 1 H), 7.38–7.43 (m, 4 H), 7.46 (dd, *J* = 2.6, 1.8 Hz, 1 H), 7.61 (d, *J* = 8.2 Hz, 2 H).

**A mixture of three isomers of (4-fluorophenyl)chlorobenzene (*o/m/p* = 64/20/16) (4np).** A colorless oil. The ratio of *o/m/p* was determined as follows. <sup>1</sup>H NMR showed that the peaks of the ortho isomer are the largest and those of the para isomer are the smallest, determined mainly from the integral the triplets (2 H, ortho to F) that appear at 7.1209 ppm (the ortho isomer), 7.135 (meta) and 7.1265 (para). However, the determination of the exact isomer ratio was difficult because of overlap of the peaks. The ratio of *o/m/p* was estimated by the integral on GC to be 64/20/16.

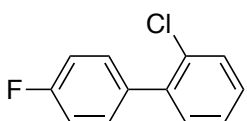

**2-Chloro-4'-fluorobiphenyl.**<sup>14</sup> <sup>1</sup>H NMR (500 MHz, CDCl<sub>3</sub>) δ 7.12 (t, *J* = 8.7 Hz, 2 H), 7.25–7.33 (m, 3 H), 7.38–7.43 (m, 2 H), 7.44–7.48 (m, 1 H).

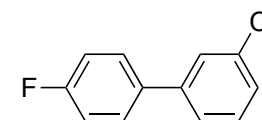

**3-Chloro-4'-fluorobiphenyl.**<sup>8</sup> <sup>1</sup>H NMR (500 MHz, CDCl<sub>3</sub>) δ 7.13 (t, *J* = 8.7 Hz, 2 H), 7.31 (m, 1 H), 7.36 (t, *J* = 7.8 Hz, 1 H), 7.39–7.43 (m, 1 H), 7.45–7.54 (m, 3 H).

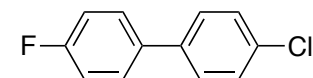

**4-Chloro-4'-fluorobiphenyl.**<sup>8</sup> <sup>1</sup>H NMR (500 MHz, CDCl<sub>3</sub>) δ 7.13 (t, *J* = 8.8 Hz, 2 H), 7.39–7.43 (m, 2 H), 7.45–7.48 (m, 2 H), 7.49–7.54 (m, 2 H).

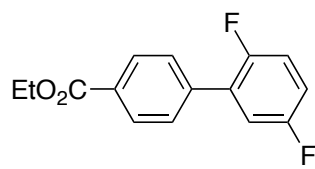

**4'-(Ethoxycarbonyl)-2,5-difluorobiphenyl (4iq).**<sup>15</sup> A white solid. <sup>1</sup>H NMR (500 MHz, CDCl<sub>3</sub>) δ 1.42 (t, *J* = 7.2 Hz, 3 H), 4.41 (q, *J* = 7.2 Hz, 2 H), 7.02–7.07 (m, 1 H), 7.11–7.19 (m, 2 H), 7.61 (d, *J* = 8.7 Hz, 2 H), 8.13 (d, *J* = 8.7 Hz, 2 H).

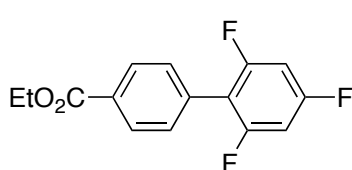

**4'-(Ethoxycarbonyl)-2,4,6-trifluorobiphenyl (4ir).** A white solid. <sup>1</sup>H NMR (500 MHz, CDCl<sub>3</sub>) δ 1.41 (t, *J* = 7.1 Hz, 3 H), 4.41 (q, *J* = 7.1 Hz, 2 H), 6.78 (t, *J* = 8.2 Hz, 2 H), 7.50 (d, *J* = 8.2 Hz, 2 H), 8.13 (d, *J* = 8.2 Hz, 2 H). <sup>13</sup>C NMR (150 MHz, CDCl<sub>3</sub>) δ 14.4, 61.2, 100.8 (td, *J* = 24, 7.2 Hz), 114.2 (t, *J* = 22 Hz), 129.6, 130.36, 130.43, 133.0, 160.3 (ddd, *J* = 250, 15, 10 Hz), 162.3 (dt, *J* = 250, 16 Hz), 166.3. Anal. Calcd for C<sub>15</sub>H<sub>11</sub>F<sub>3</sub>O<sub>2</sub>: C, 64.29; H, 3.96. Found: C, 64.33; H, 3.79.

**A mixture of two isomers of (4-bromophenyl)thiophene (2-/3- = 84/16) (4as).** A pale yellow solid. The isomer ratio was determined by GC and confirmed by <sup>1</sup>H NMR.

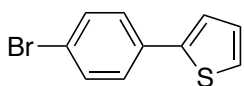

**2-(4-Bromophenyl)thiophene.**<sup>16</sup> <sup>1</sup>H NMR (500 MHz, CDCl<sub>3</sub>) δ 7.08 (t, *J* = 4.3 Hz, 1 H), 7.30 (d, *J* = 4.3 Hz, 2 H), 7.47 (d, *J* = 9.0 Hz, 2 H), 7.50 (d, *J* = 9.0 Hz, 2 H).

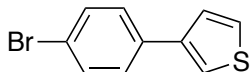

**3-(4-Bromophenyl)thiophene.**<sup>17</sup> <sup>1</sup>H NMR (500 MHz, CDCl<sub>3</sub>) δ 7.35 (dd, *J* = 5.0, 1.3 Hz, 1 H), 7.40 (dd, *J* = 5.0, 2.9 Hz, 1 H), 7.44 (dd, *J* = 2.9, 1.3 Hz, 1 H), 7.45–7.53 (m, 4 H).

**A mixture of two isomers of (3-methoxyphenyl)-3-bromothiophene (2-/5- = 75/25) (4kt).** A colorless oil. The isomer ratio was determined by GC and confirmed by <sup>1</sup>H NMR.

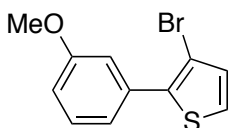

**3-Bromo-2-(3-methoxyphenyl)thiophene.**<sup>18</sup> <sup>1</sup>H NMR (500 MHz, CDCl<sub>3</sub>) δ 3.86 (s, 3 H), 6.93 (dd, *J* = 8.3, 2.6 Hz, 1 H), 7.05 (d, *J* = 5.3 Hz, 1 H), 7.21–7.24 (m, 2 H), 7.28 (d, *J* = 5.3 Hz, 1 H), 7.34 (t, *J* = 8.2 Hz, 1 H).

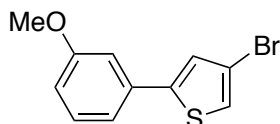

**4-Bromo-2-(3-methoxyphenyl)thiophene.**<sup>18</sup> <sup>1</sup>H NMR (500 MHz, CDCl<sub>3</sub>) δ 3.85 (s, 3 H), 6.87 (dd, *J* = 8.3, 2.5 Hz, 1 H), 7.08 (t, *J* = 2.1 Hz, 1 H), 7.15 (d, *J* = 7.7 Hz, 1 H), 7.17 (d, *J* = 1.4 Hz, 1 H), 7.20 (d, *J* = 1.4 Hz, 1 H), 7.30 (t, *J* = 8.0 Hz, 1 H).

**ICP-MS (Inductively Coupled Plasma-Mass Spectrometry) of Fe(OTf)<sub>3</sub> (Footnote 15).** A sample was prepared by diluting Fe(OTf)<sub>3</sub> with 1-methyl-2-pyrrolidone in 10,000-fold. Analysis was conducted on Agilent 7500cs using XSTC-7, 13B (SPEX) as a standard solution for calibration curve. The contents are shown in Table S1.

**Table S1** ICP-MS analysis on the contents (ppm) of elements in Fe(OTf)<sub>3</sub>

| Co | Ni | Cu | Ru | Rh | Pd | Ag | Ir | Pt | Au |
|----|----|----|----|----|----|----|----|----|----|
| <5 | 26 | 29 | <5 | <5 | <5 | <5 | <5 | <5 | <5 |

**Reaction of 4-Bromophenylboronic Acid with Di-tert-butyl Hyponitrite and  $\text{CDCl}_3$  (Scheme 2).** A solution of 4-bromophenylboronic acid (**1a**: 24.1 mg, 0.120 mmol) and di-tert-butyl hyponitrite (25.1 mg, 0.144 mmol) in  $\text{CDCl}_3$  (1.0 mL) was stirred at 60 °C for 12 h. After adding  $\text{MeNO}_2$  as an internal standard, the resulting solution was subjected to  $^1\text{H}$  NMR analysis to determine the yield of 1-bromo-4-deuteriobenzene (**6**) and its deuteration ratio.

**Reaction of Iron Complexes with Di-tert-butyl Peroxide in the Presence of 4-Bromophenylboronic Acid and  $\text{CDCl}_3$  (Scheme 3): General Procedure.** To a partial suspension of  $\text{Fe}(\text{OTf})_3$  (30.2 mg, 0.0600 mmol), a ligand (0.060 mmol), and 4-bromophenylboronic acid (**1a**: 12.0 mg, 0.0600 mmol) in 0.60 mL of  $\text{CDCl}_3$  in a 20 mL Schlenk tube was added *t*-BuOO*t*-Bu (**3**: 11  $\mu\text{L}$ , 0.059 mmol). After stirring at 60 °C for the time specified in Scheme 3, nonane as an internal standard was added to the resulting solution. An aliquot of the solution was subjected to GC analysis to determine the yield of 1-bromo-4-deuteriobenzene (**6**) and the conversion of **3**. After concentration, the residue was subjected to  $\text{SiO}_2$  chromatography (PTLC) to obtain **6** for determination of its deuteration ratio by  $^1\text{H}$  NMR.

## References

- 1 A.-P. Schaffner and P. Renaud, *Angew. Chem., Int. Ed.*, 2003, **42**, 2658.
- 2 J. C. Loren and J. S. Siegel, *Angew. Chem., Int. Ed.*, 2001, **40**, 754.
- 3 R. H. Taylor and F.-X. Felpin, *Org. Lett.*, 2007, **9**, 2911.
- 4 L. Wang and W. Lu, *Org. Lett.*, 2009, **11**, 1079.
- 5 D. W. Old, J. P. Wolfe and S. L. Buchwald, *J. Am. Chem. Soc.*, 1998, **120**, 9722.
- 6 N. Hoshiya, M. Shimoda, H. Yoshikawa, Y. Yamashita, S. Shuto and M. Arisawa, *J. Am. Chem. Soc.*, 2010, **132**, 7270.
- 7 L. K. Rasmussen, M. Begtrup and T. Ruhland, *J. Org. Chem.*, 2006, **71**, 1230.
- 8 J. M. A. Miguez, L. A. Adrio, A. Sousa-Pedrares, J. M. Vila and K. K. M. Hii, *J. Org. Chem.*, 2007, **72**, 7771.
- 9 X. Bei, H. W. Turner, W. H. Weinberg and A. S. Guram, *J. Org. Chem.*, 1999, **64**, 6797.
- 10 K. Inamoto, J. Kuroda, E. Kwon, K. Hiroya and T. Doi, *J. Organomet. Chem.*, 2009, **694**, 389.
- 11 L. Ackermann, H. K. Potukuchi, A. Althammer, R. Born and P. Mayer, *Org. Lett.*, 2010, **12**, 1004.
- 12 K. Worm-Leonhard and M. Meldal, *Eur. J. Org. Chem.*, 2008, 5244.
- 13 Y. M. A. Yamada, T. Watanabe, T. Beppu, N. Fukuyama, K. Torii and Y. Uozumi, *Chem. Eur. J.*, 2010, **16**, 11311.
- 14 W.-J. Zhou, K.-H. Wang, J.-X. Wang and D.-F. Huang, *Eur. J. Org. Chem.*, 2010, 416.
- 15 S. H. Wunderlich and P. Knochel, *Angew. Chem., Int. Ed.*, 2009, **48**, 1501.
- 16 T. J. Dingemans, N. S. Murthy and E. T. Samulski, *J. Phys. Chem. B*, 2001, **105**, 8845.
- 17 L. S. Varnedoe, B. D. Angel, J. L. McClellan and J. M. Hanna, Jr., *Lett. Org. Chem.*, 2010, **7**, 1.
- 18 E. Bey, S. Marchais-Oberwinkler, R. Werth, M. Negri, Y. A. Al-Soud, P. Kruchten, A. Oster, M. Frotscher, B. Birk and R. W. Hartmann, *J. Med. Chem.*, 2008, **51**, 6725.

## $^1\text{H}$ and $^{13}\text{C}$ NMR Spectra of a Ligand and the Coupling Products

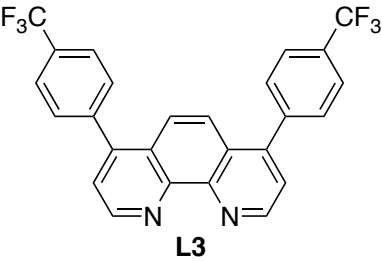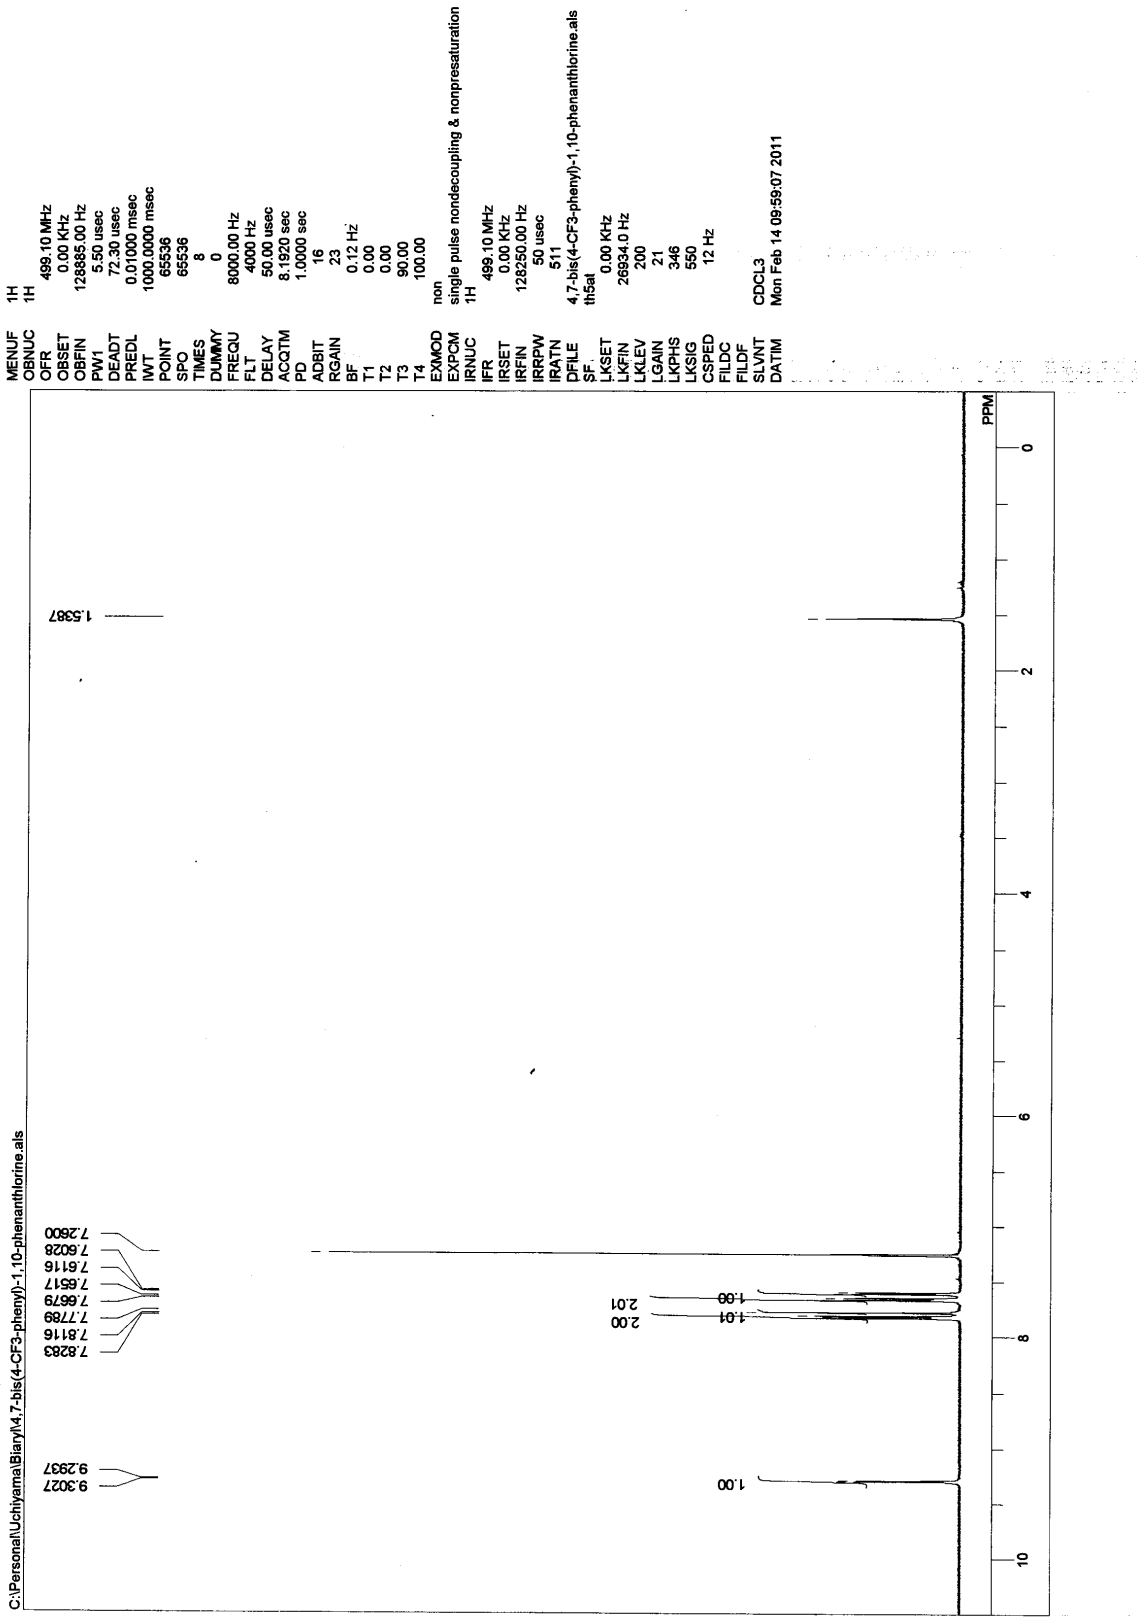

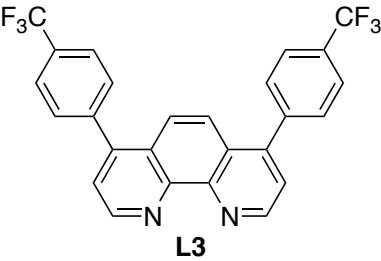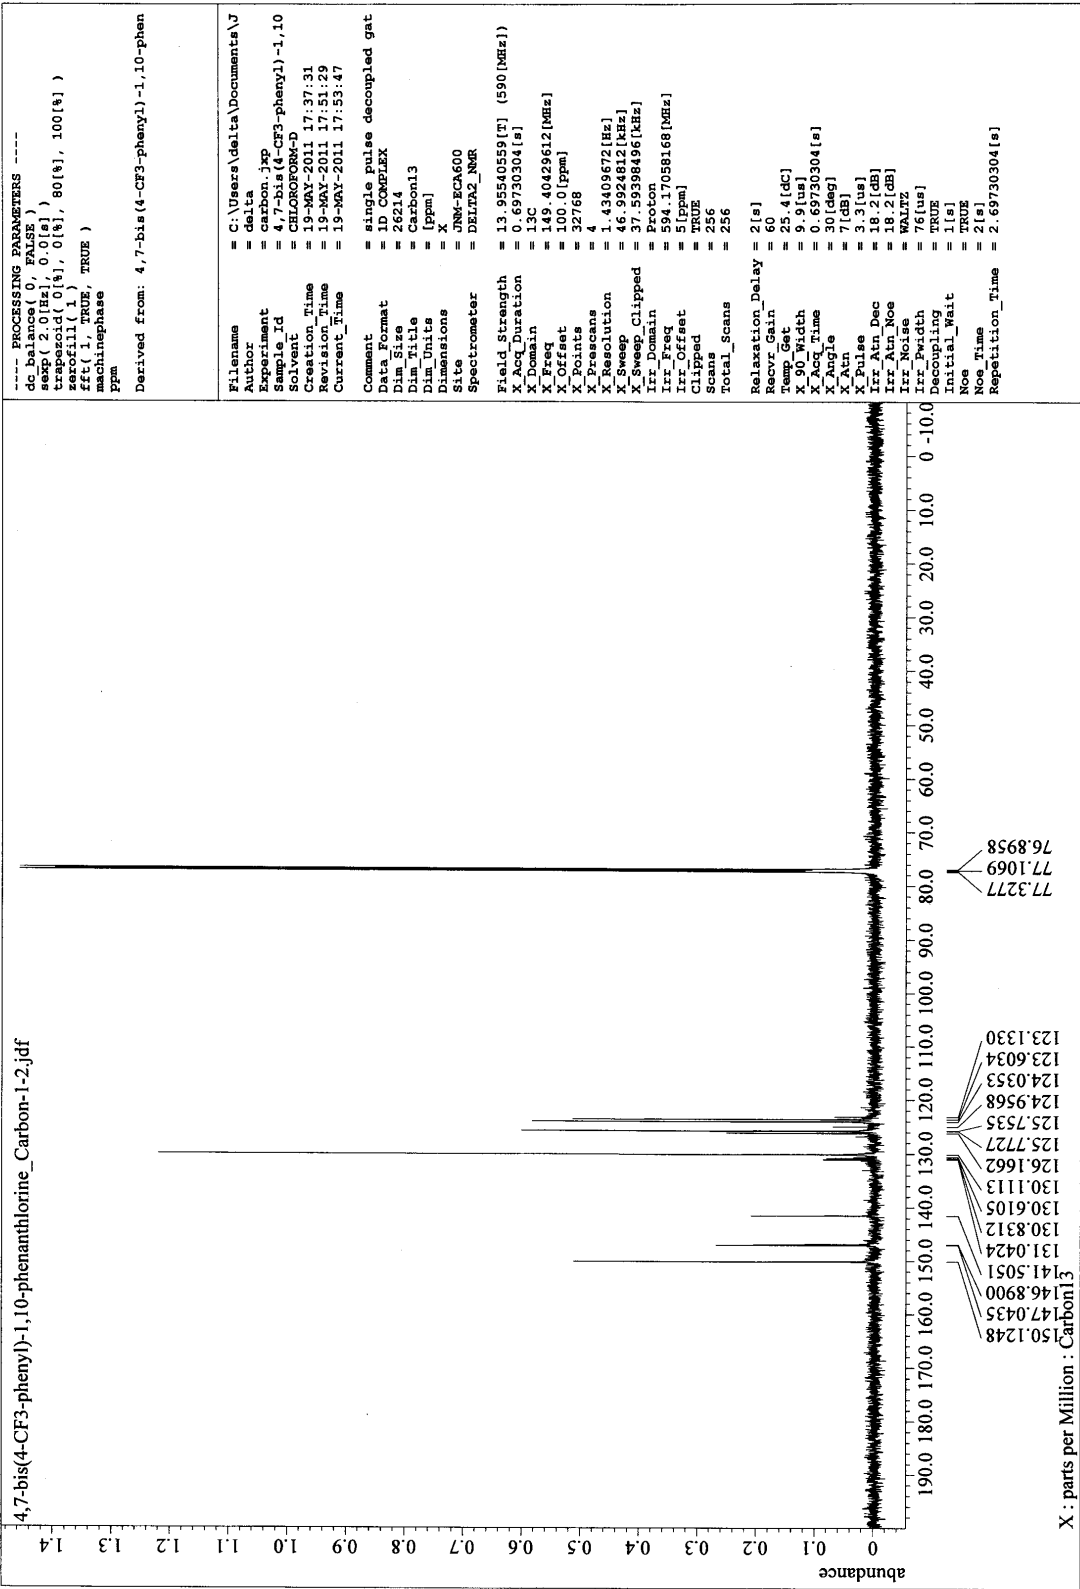

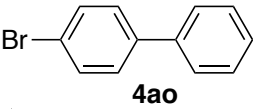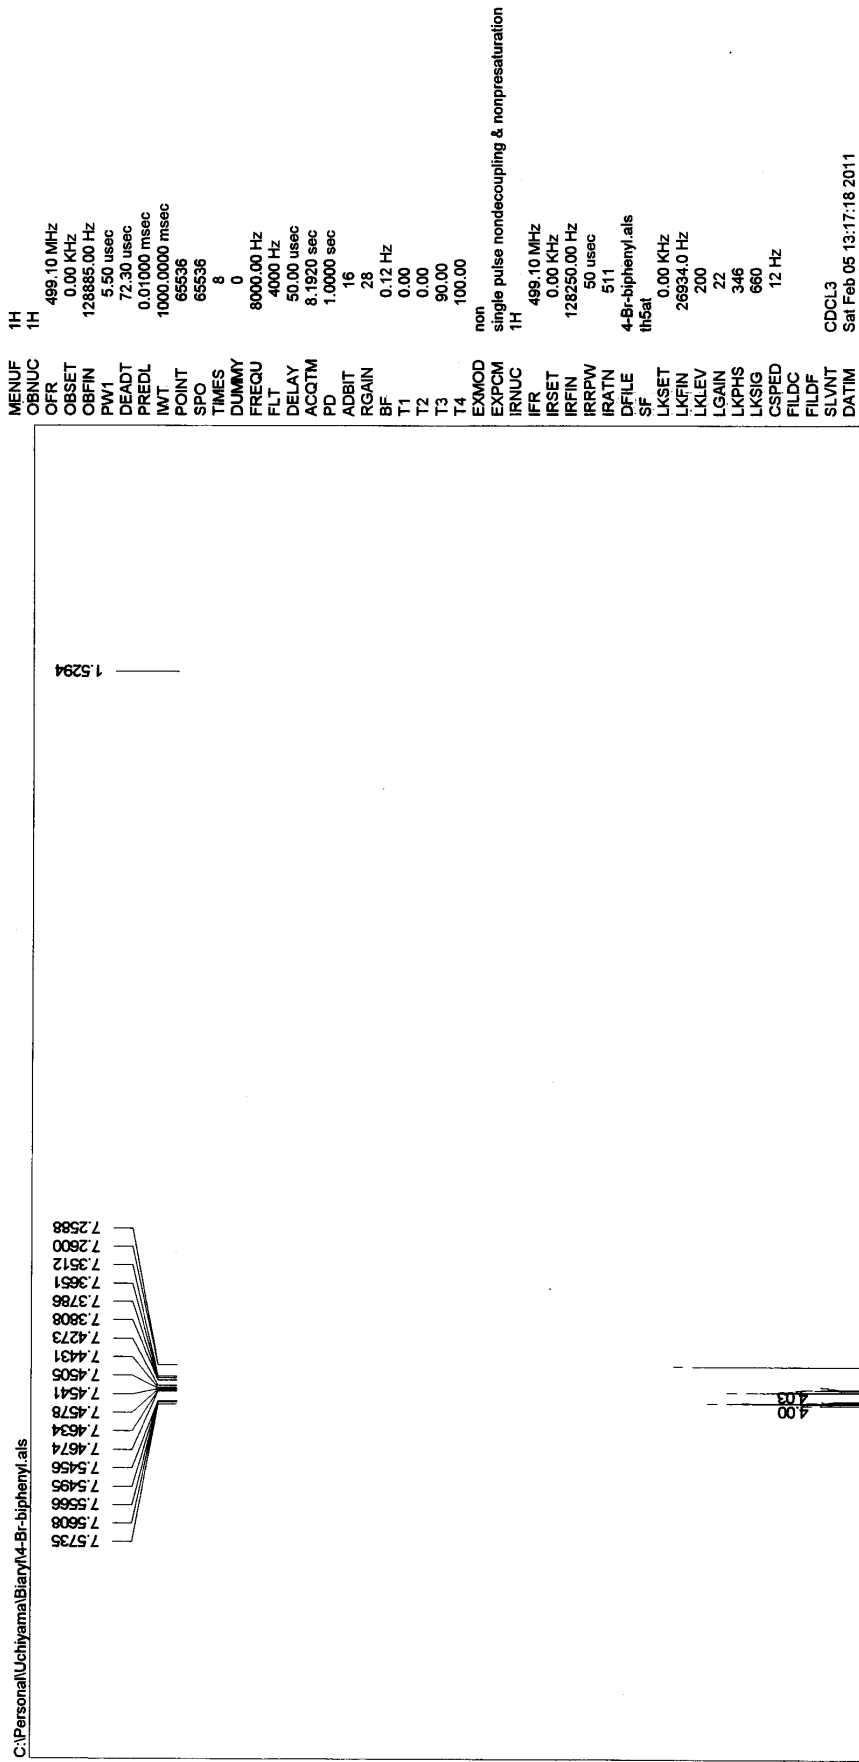

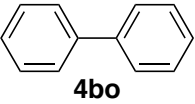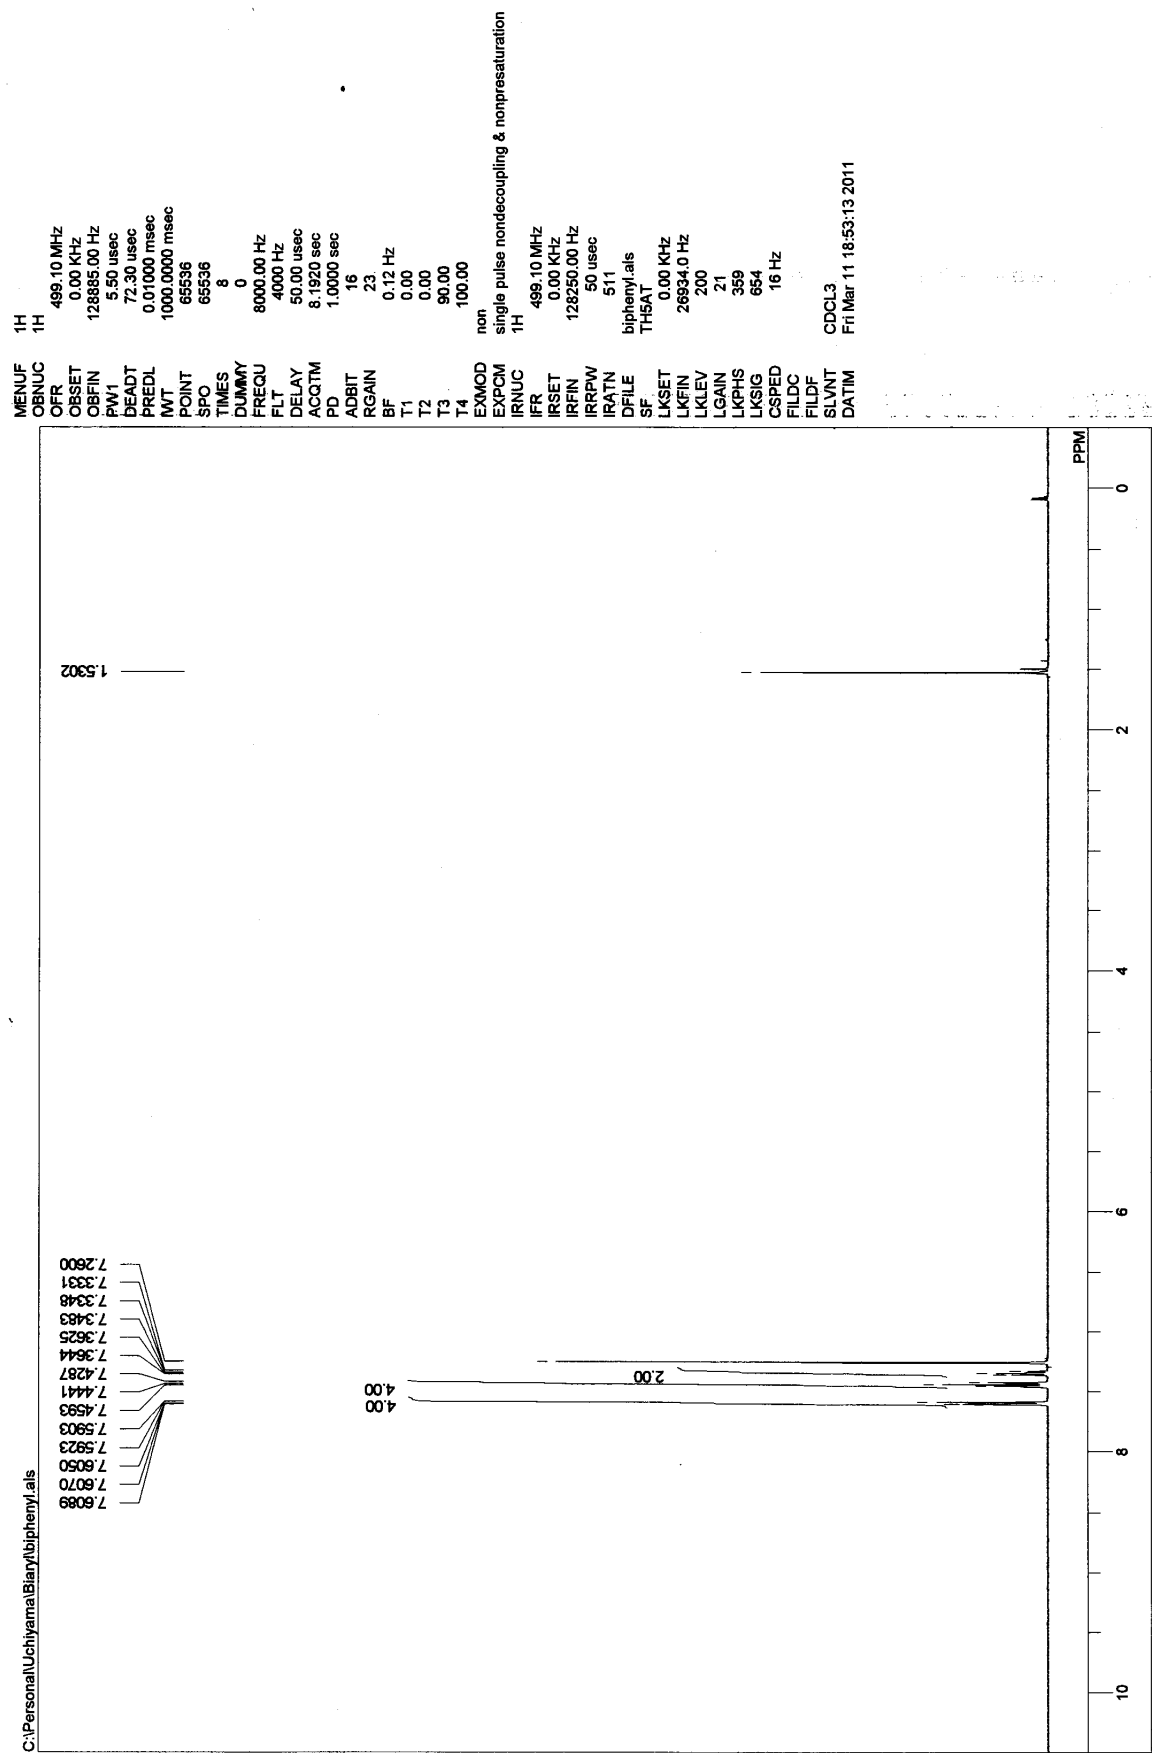

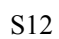

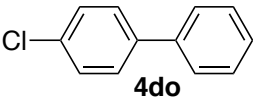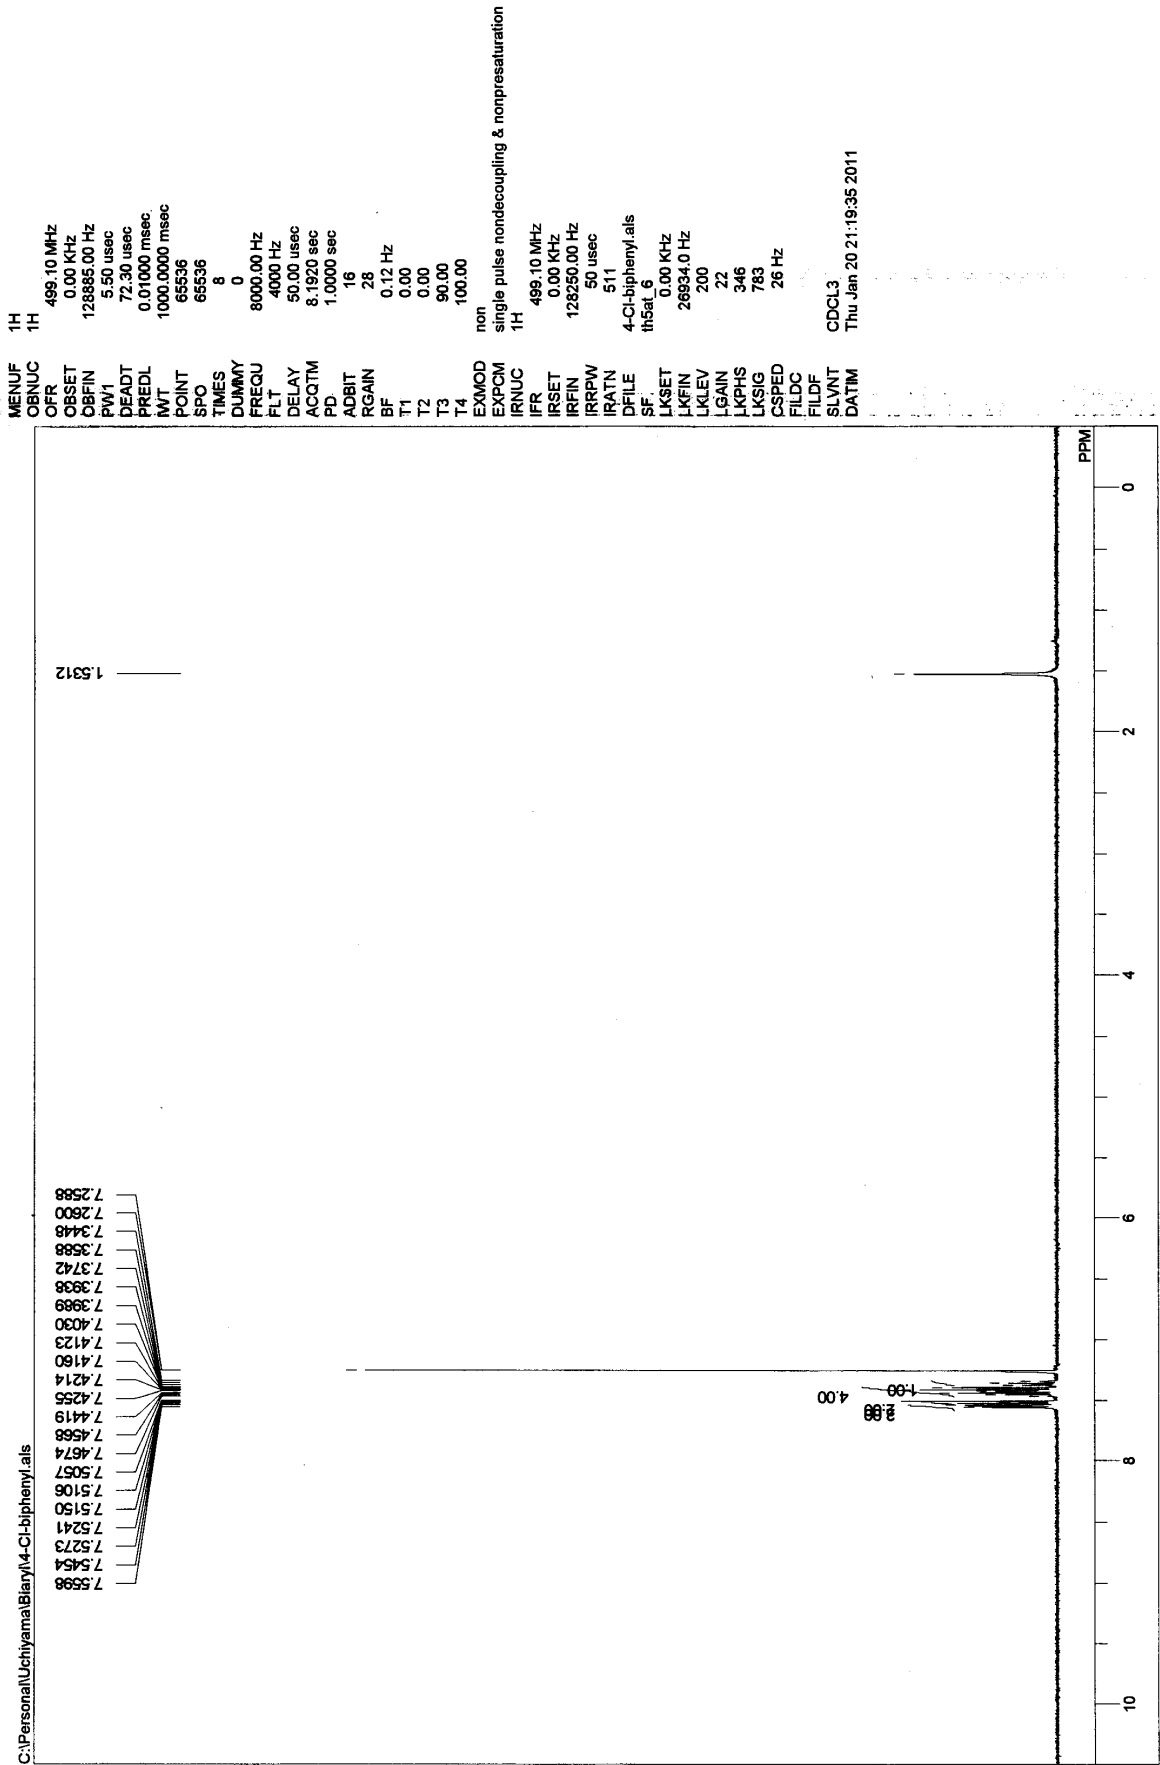

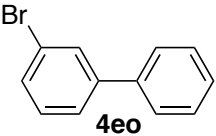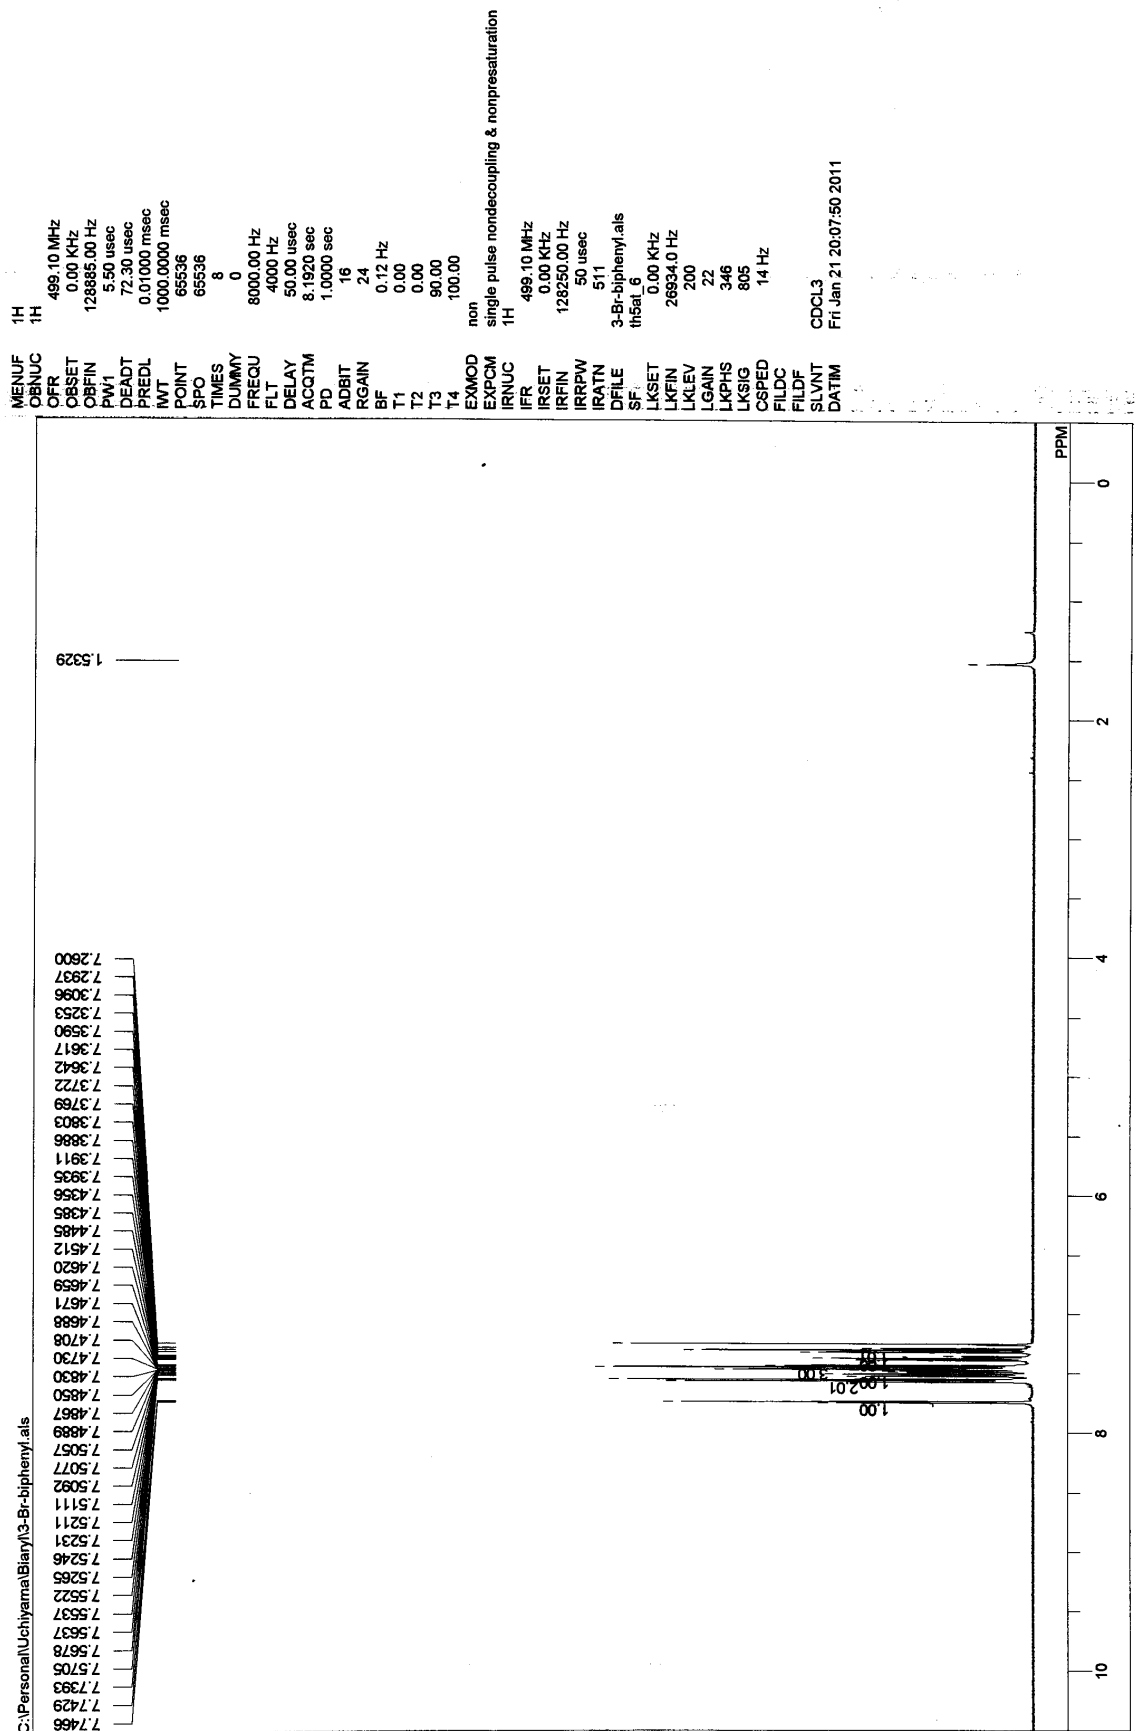

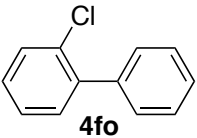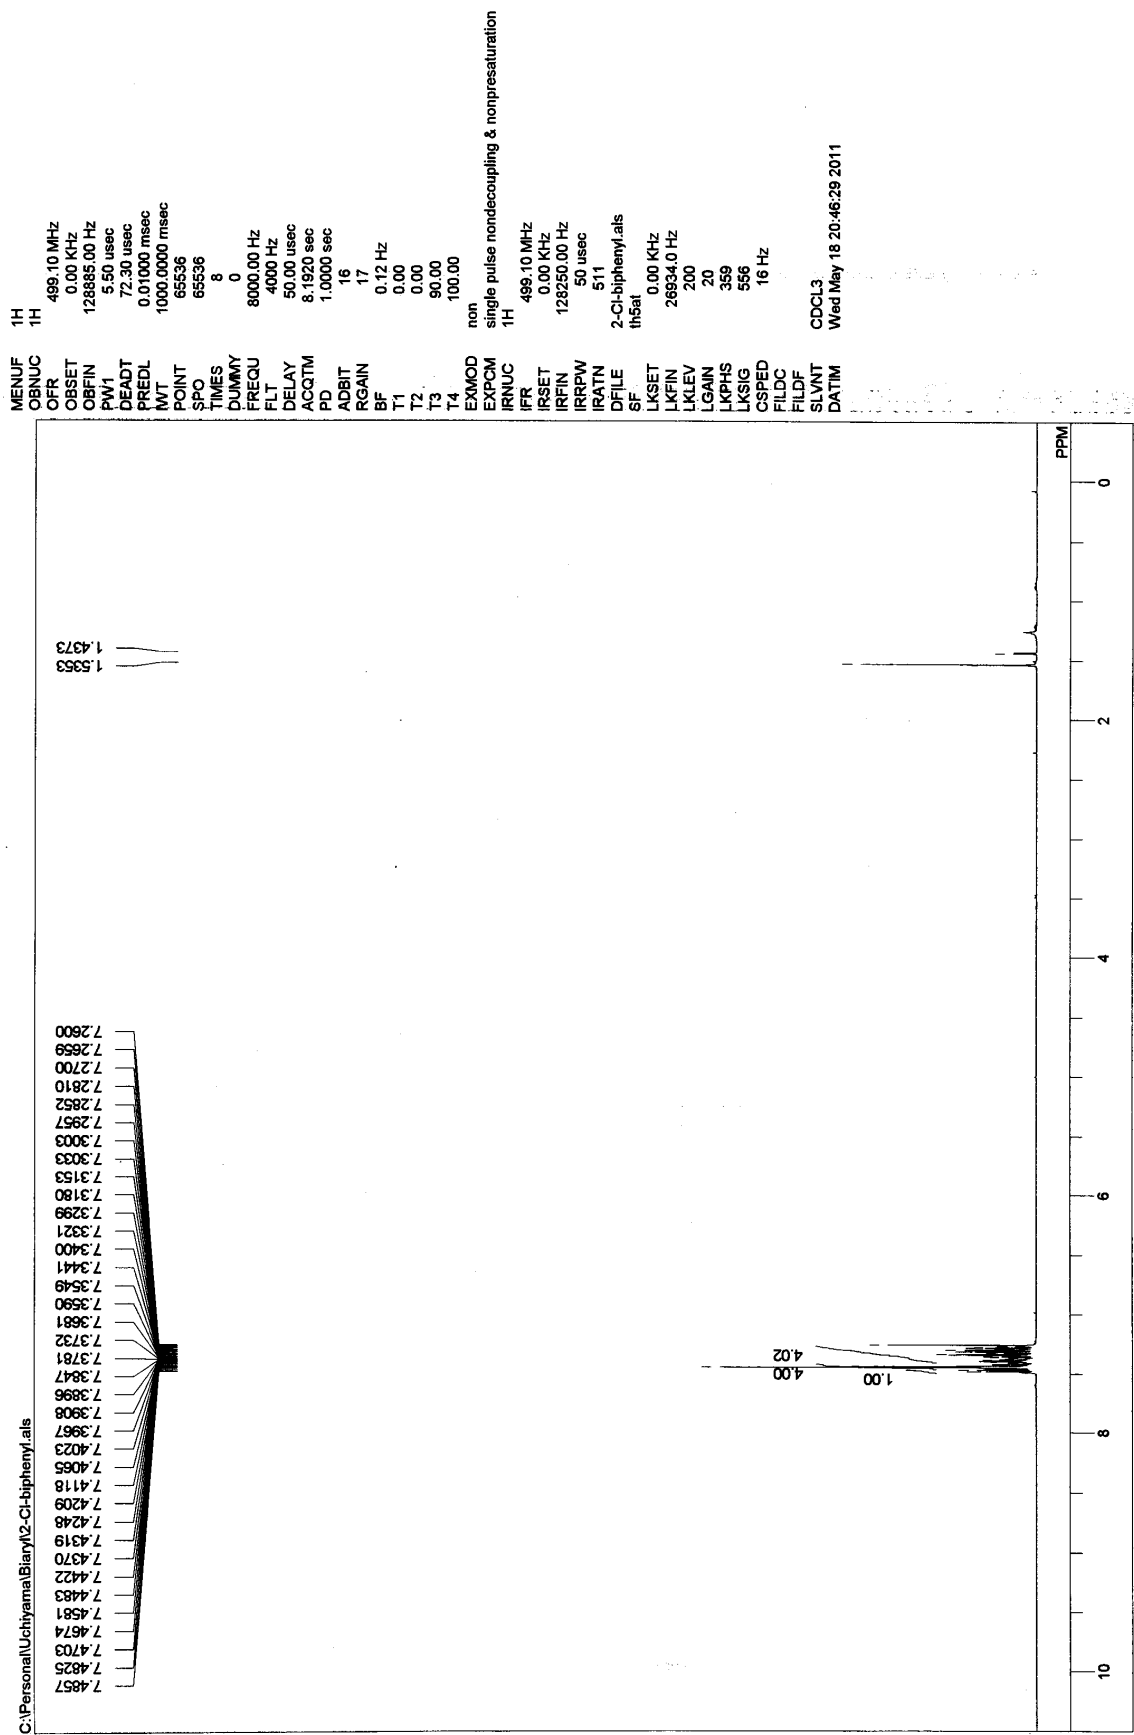

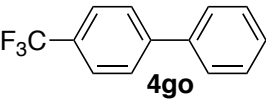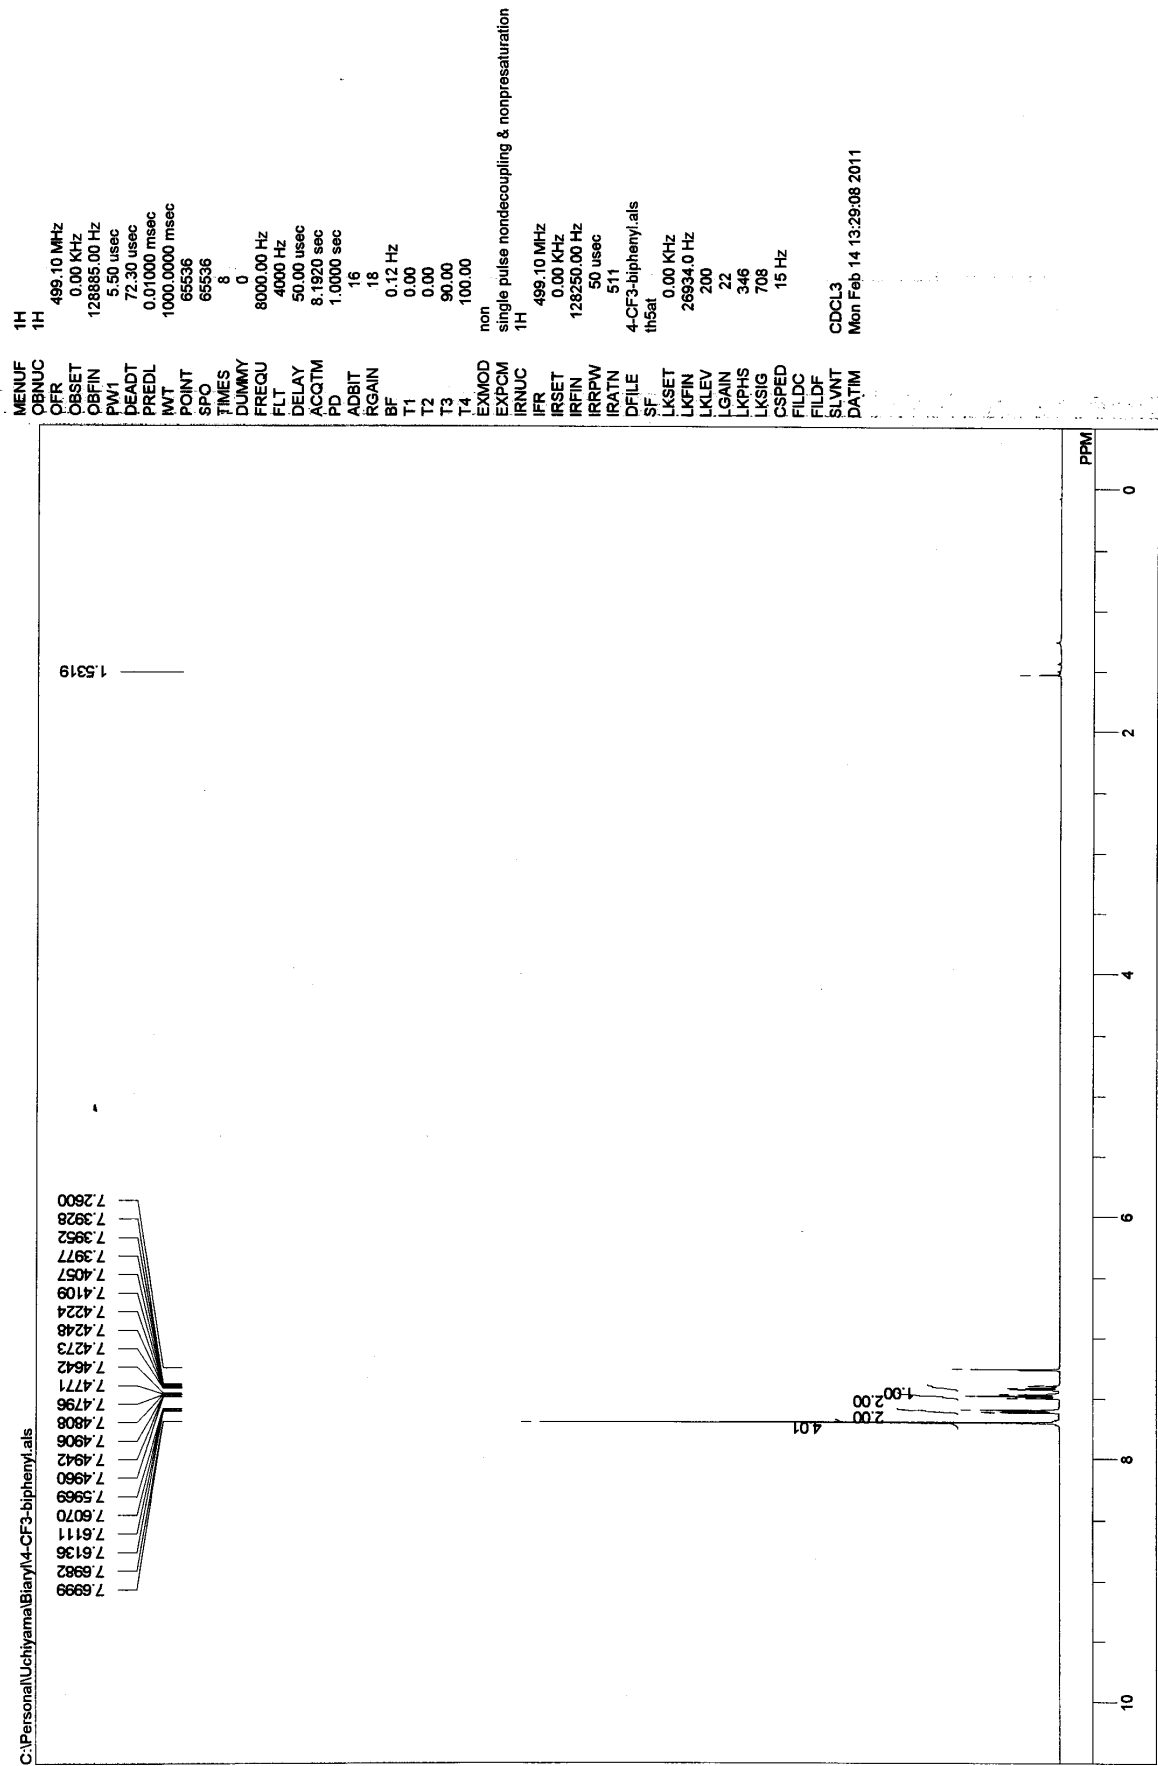

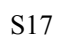

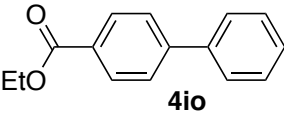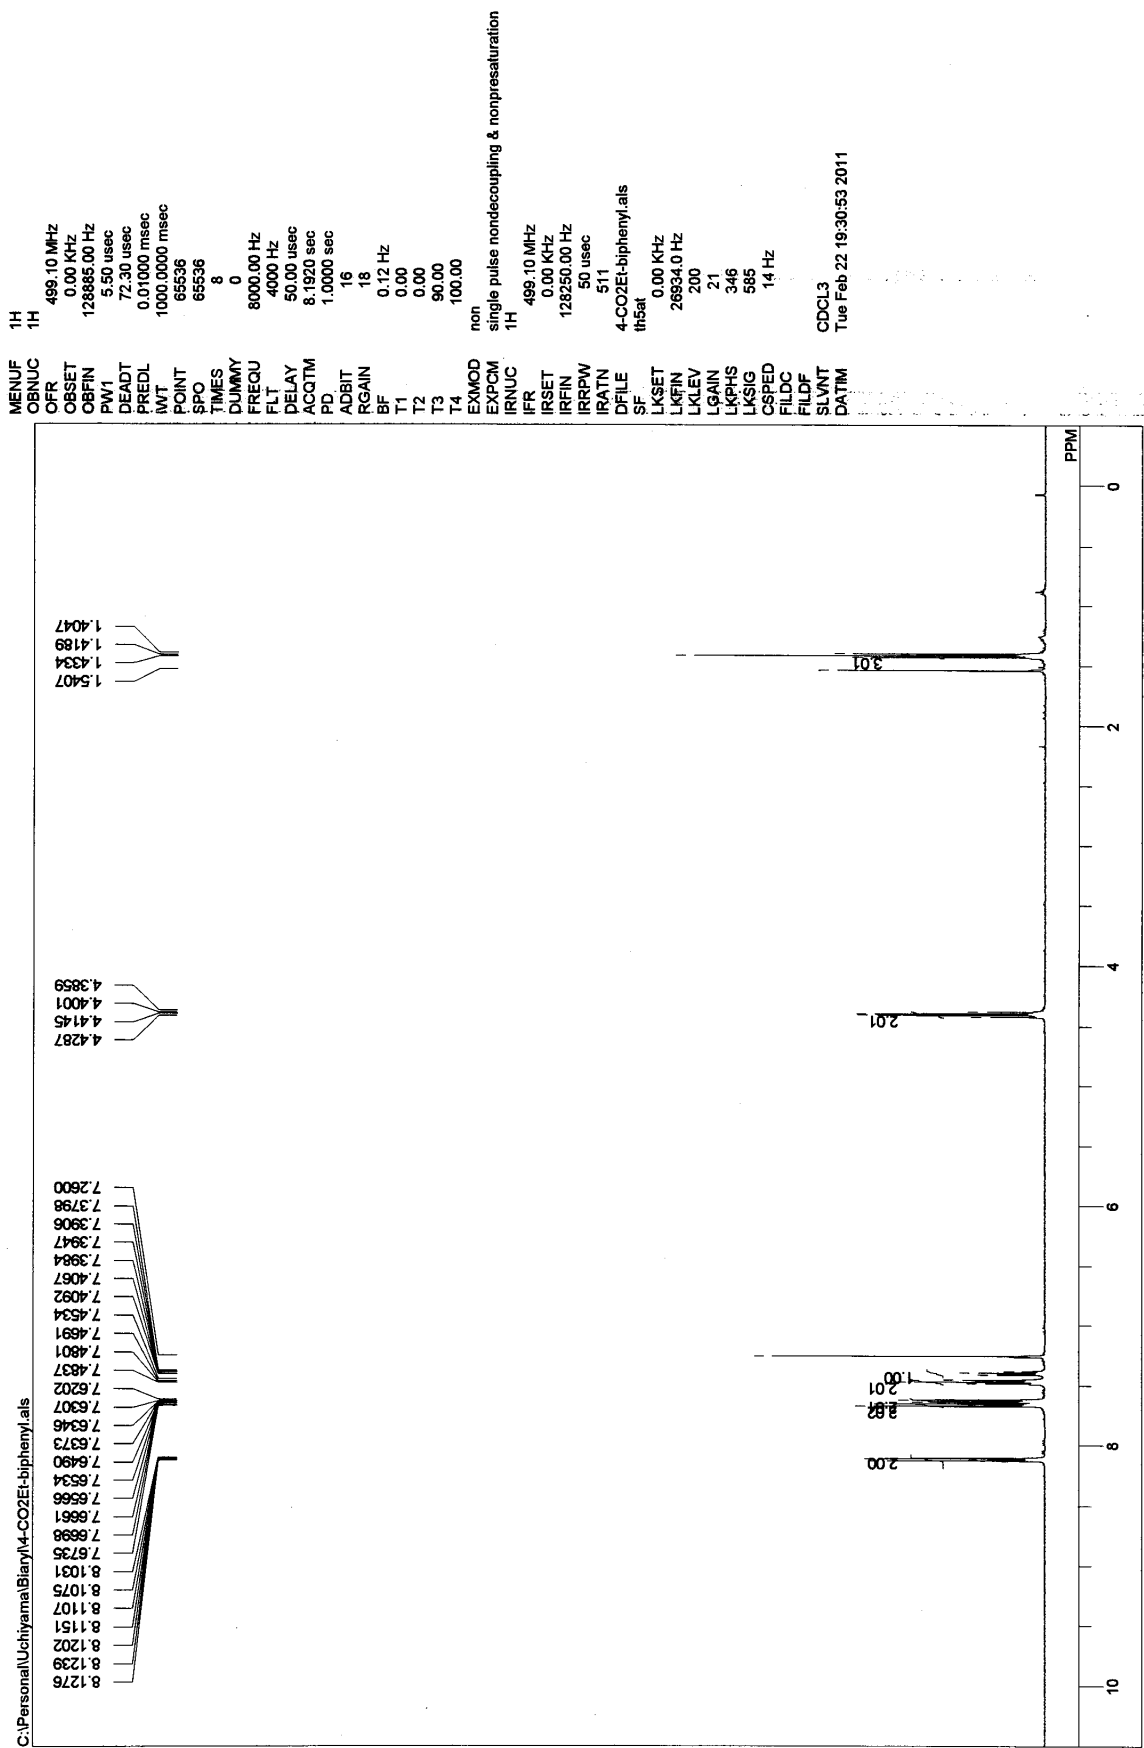

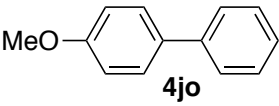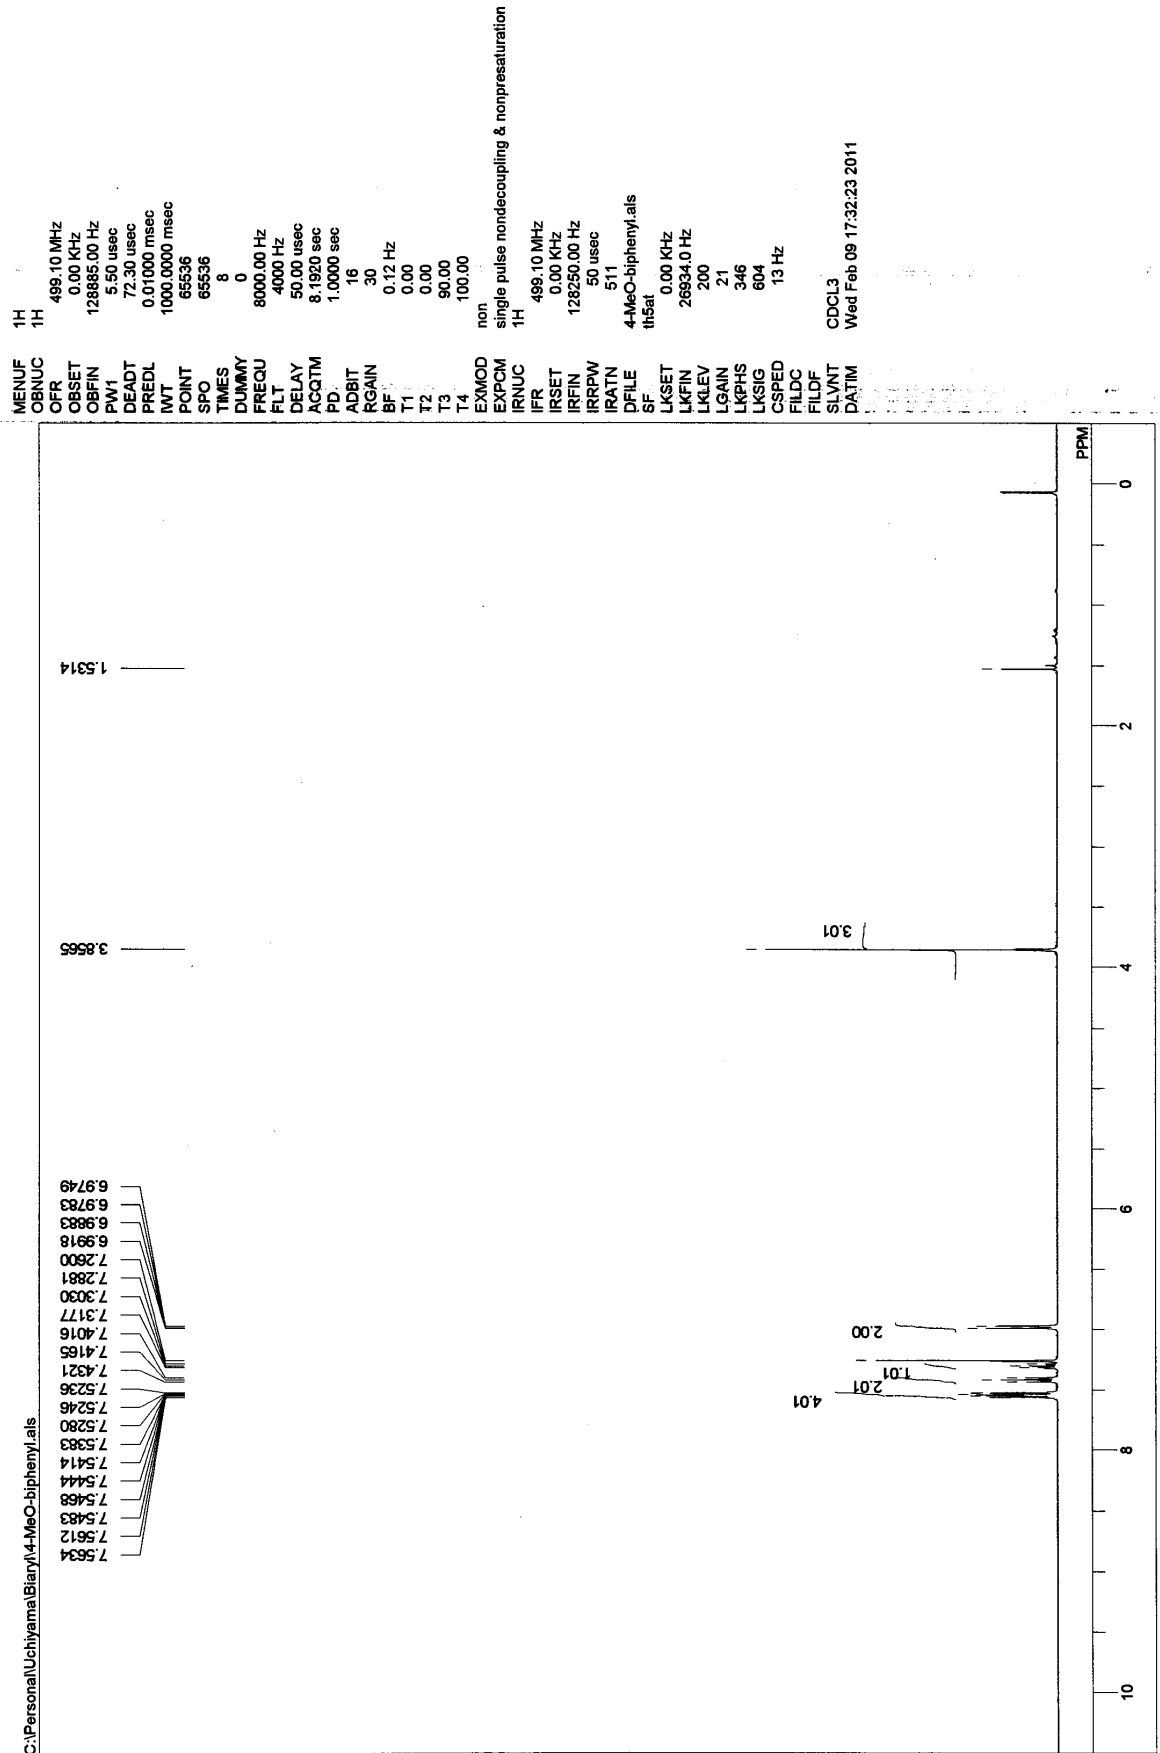

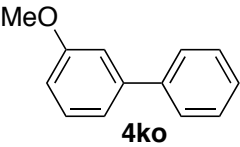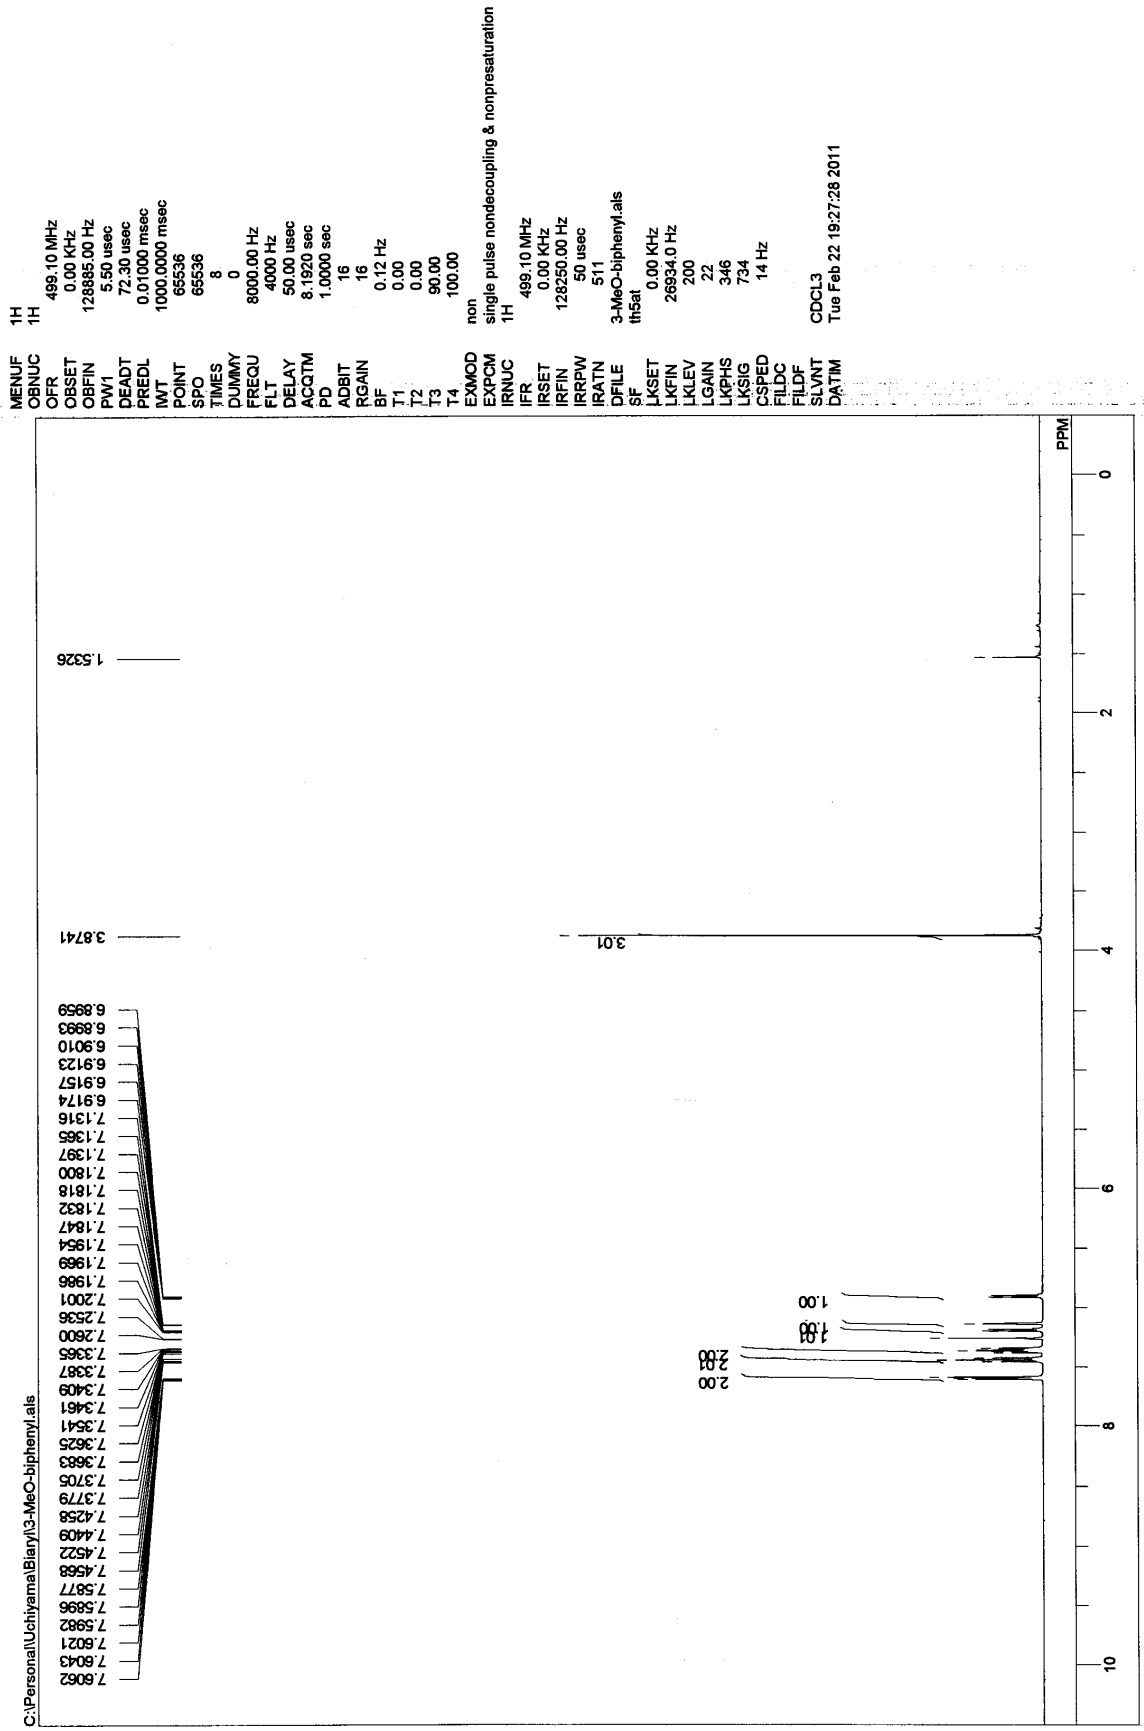

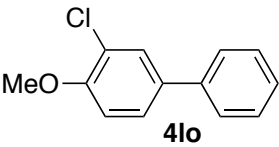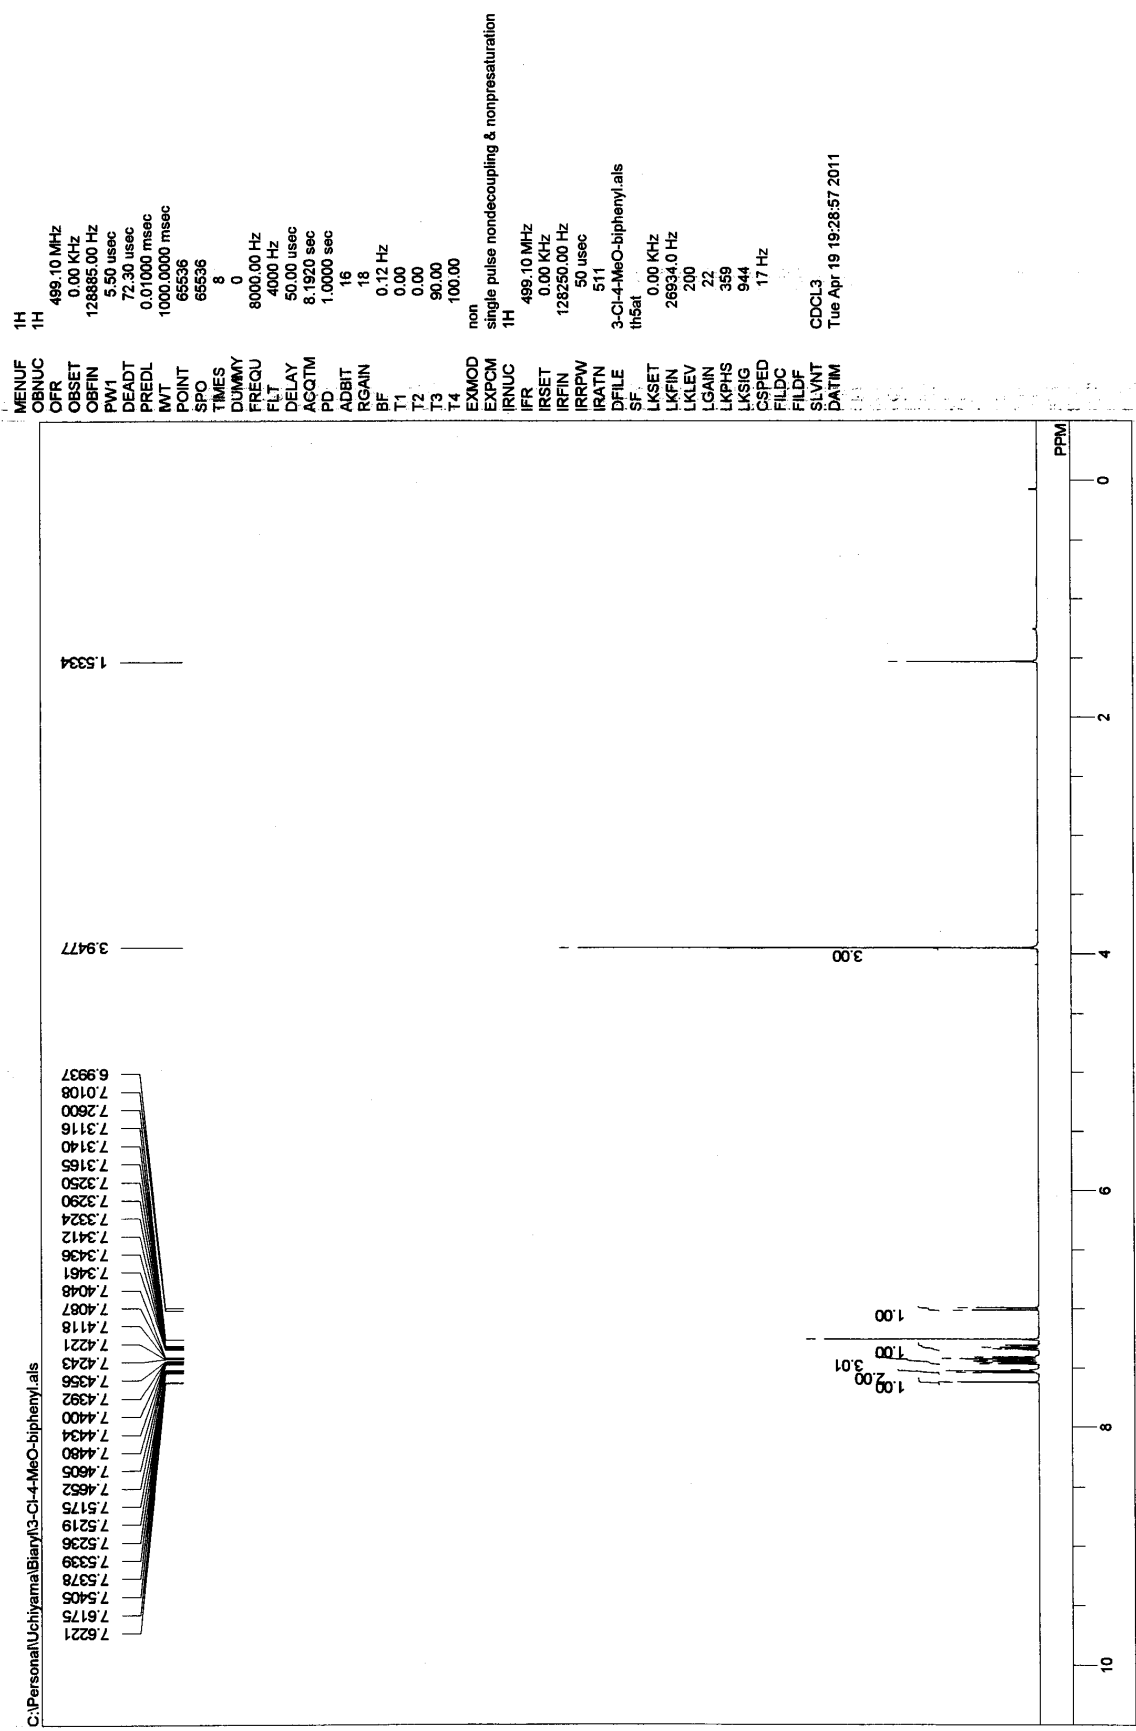

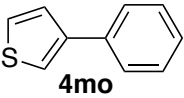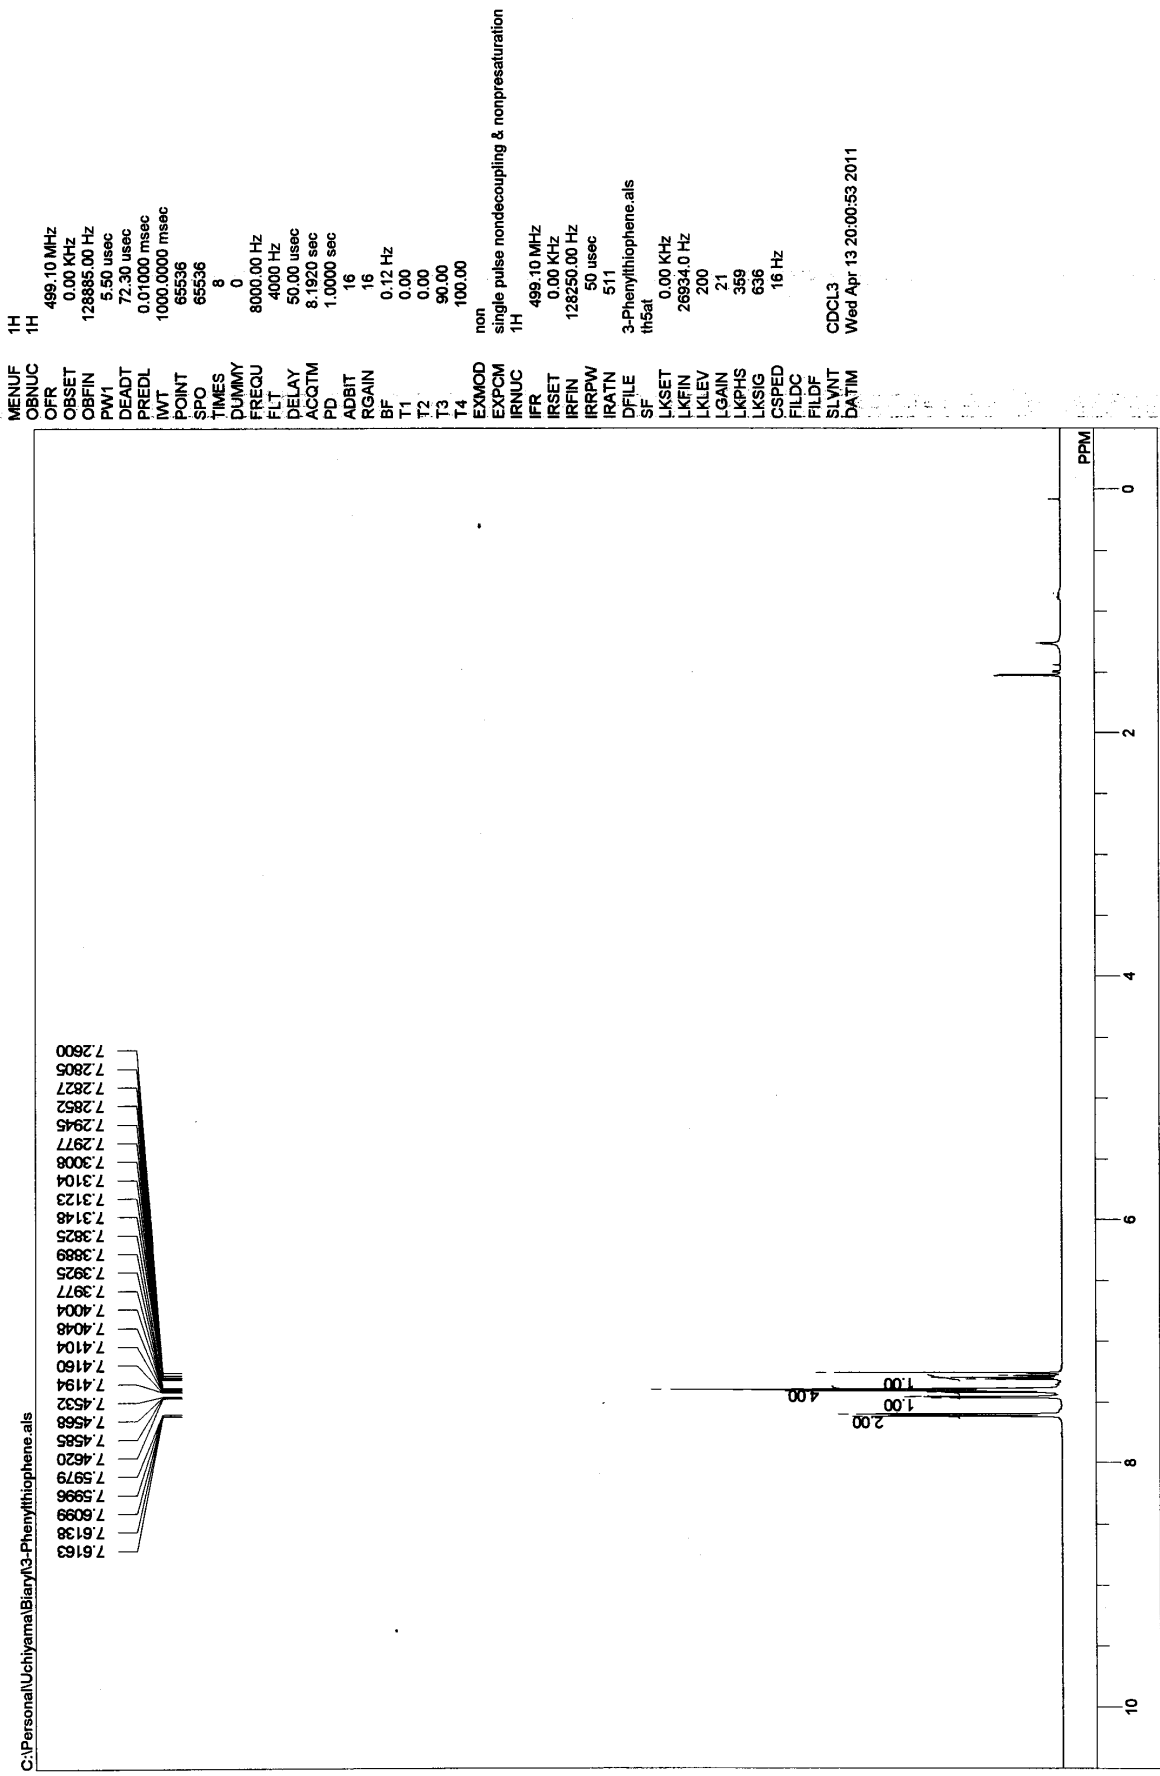

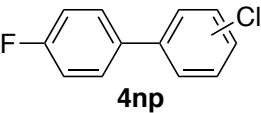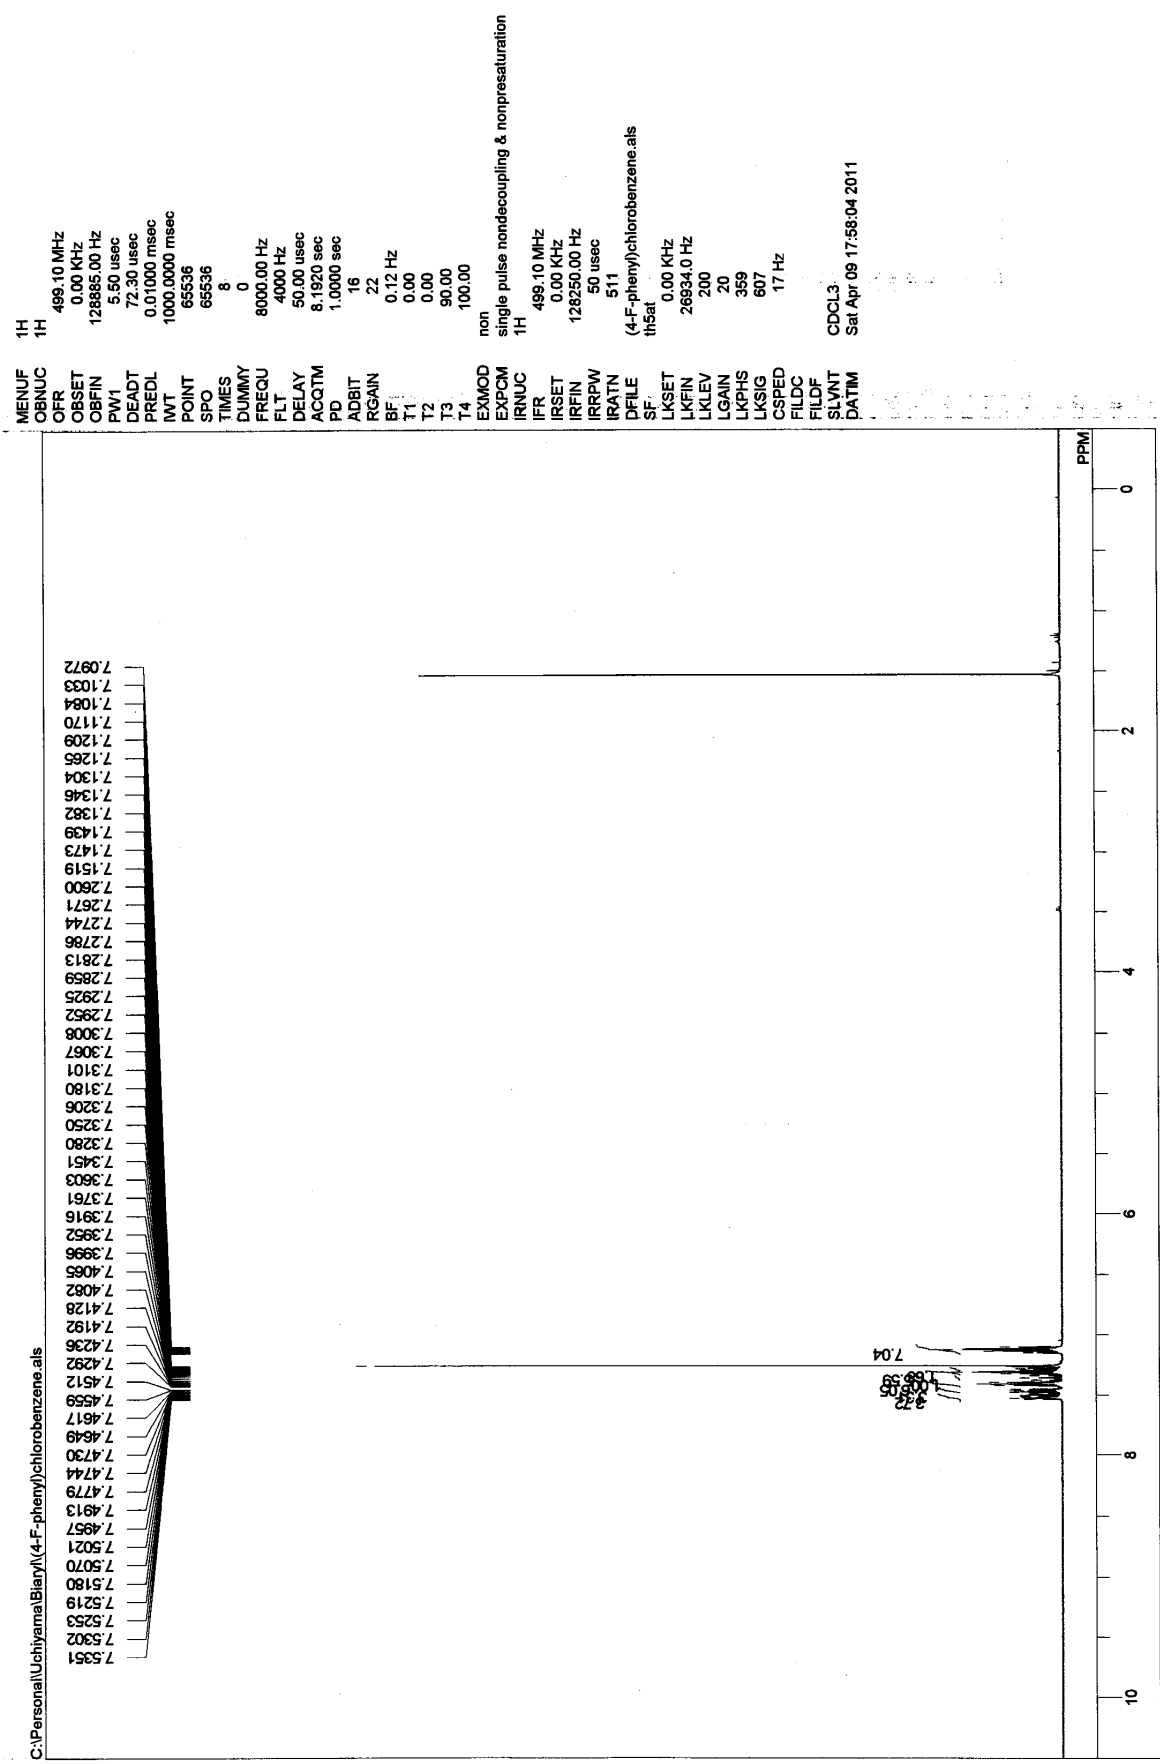

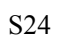

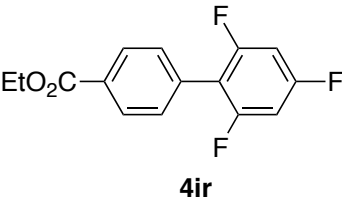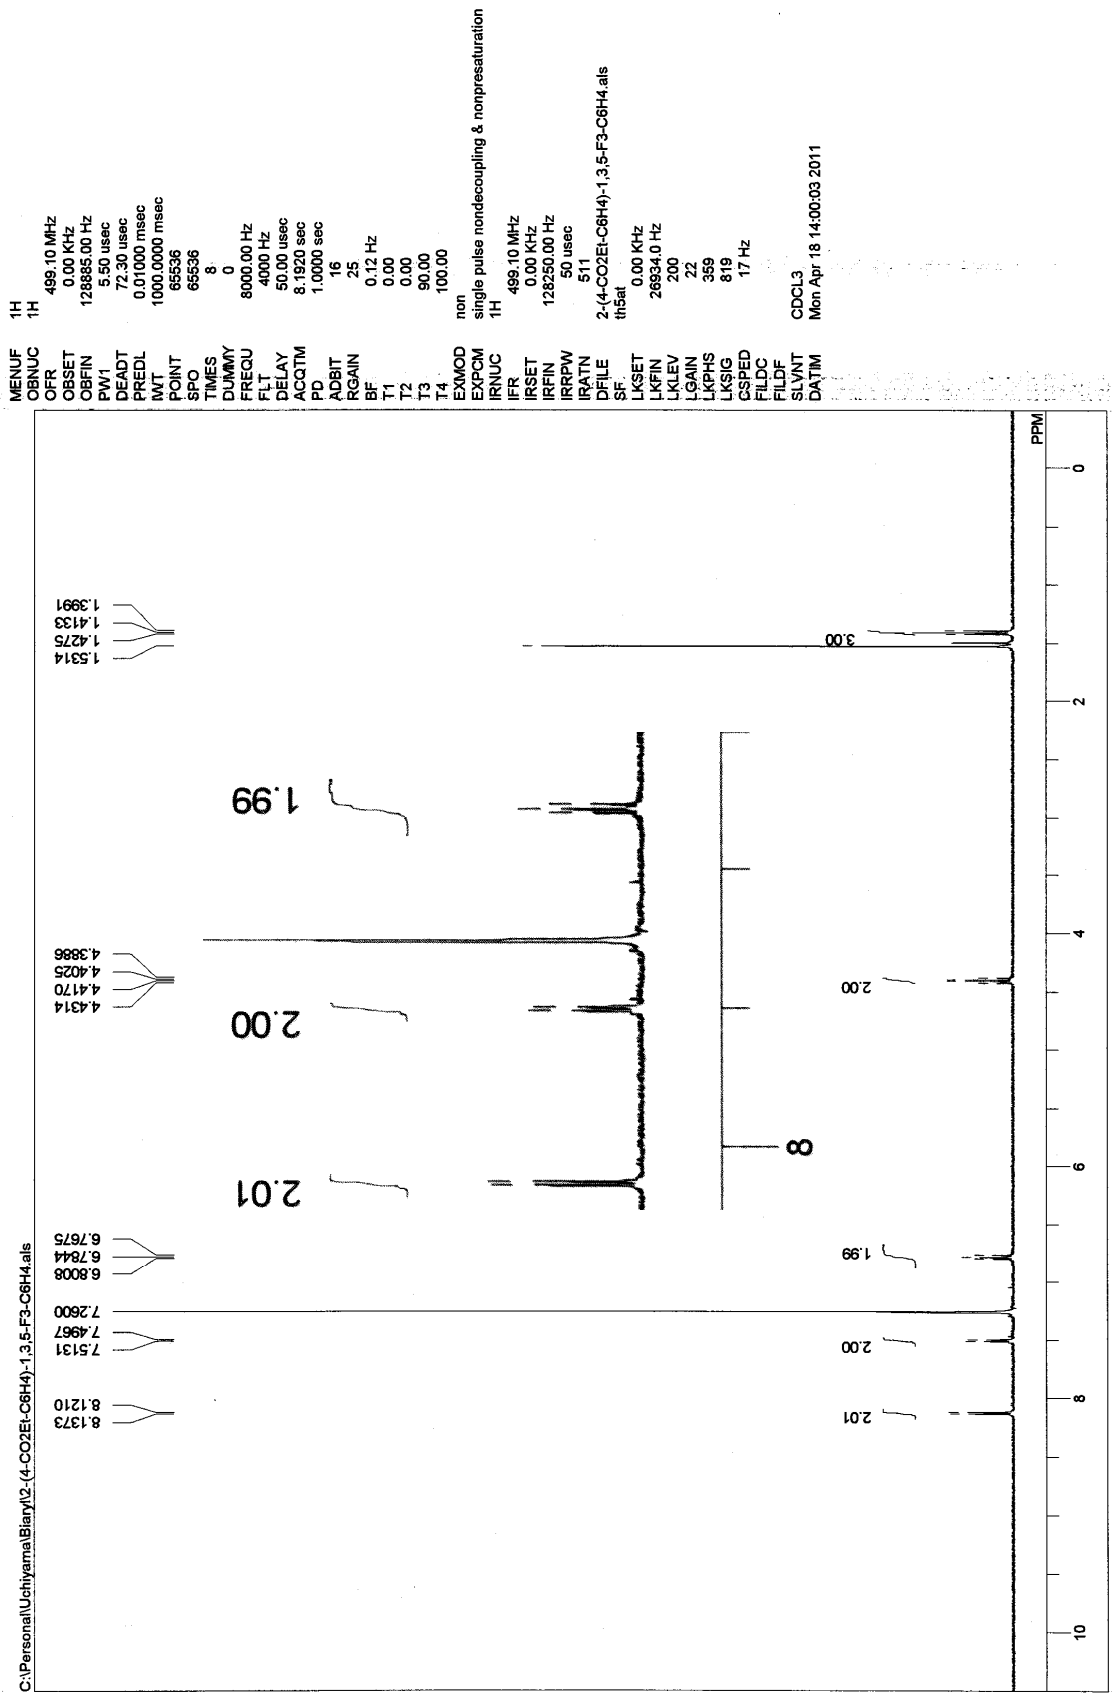

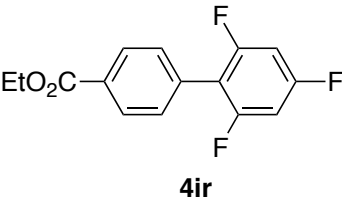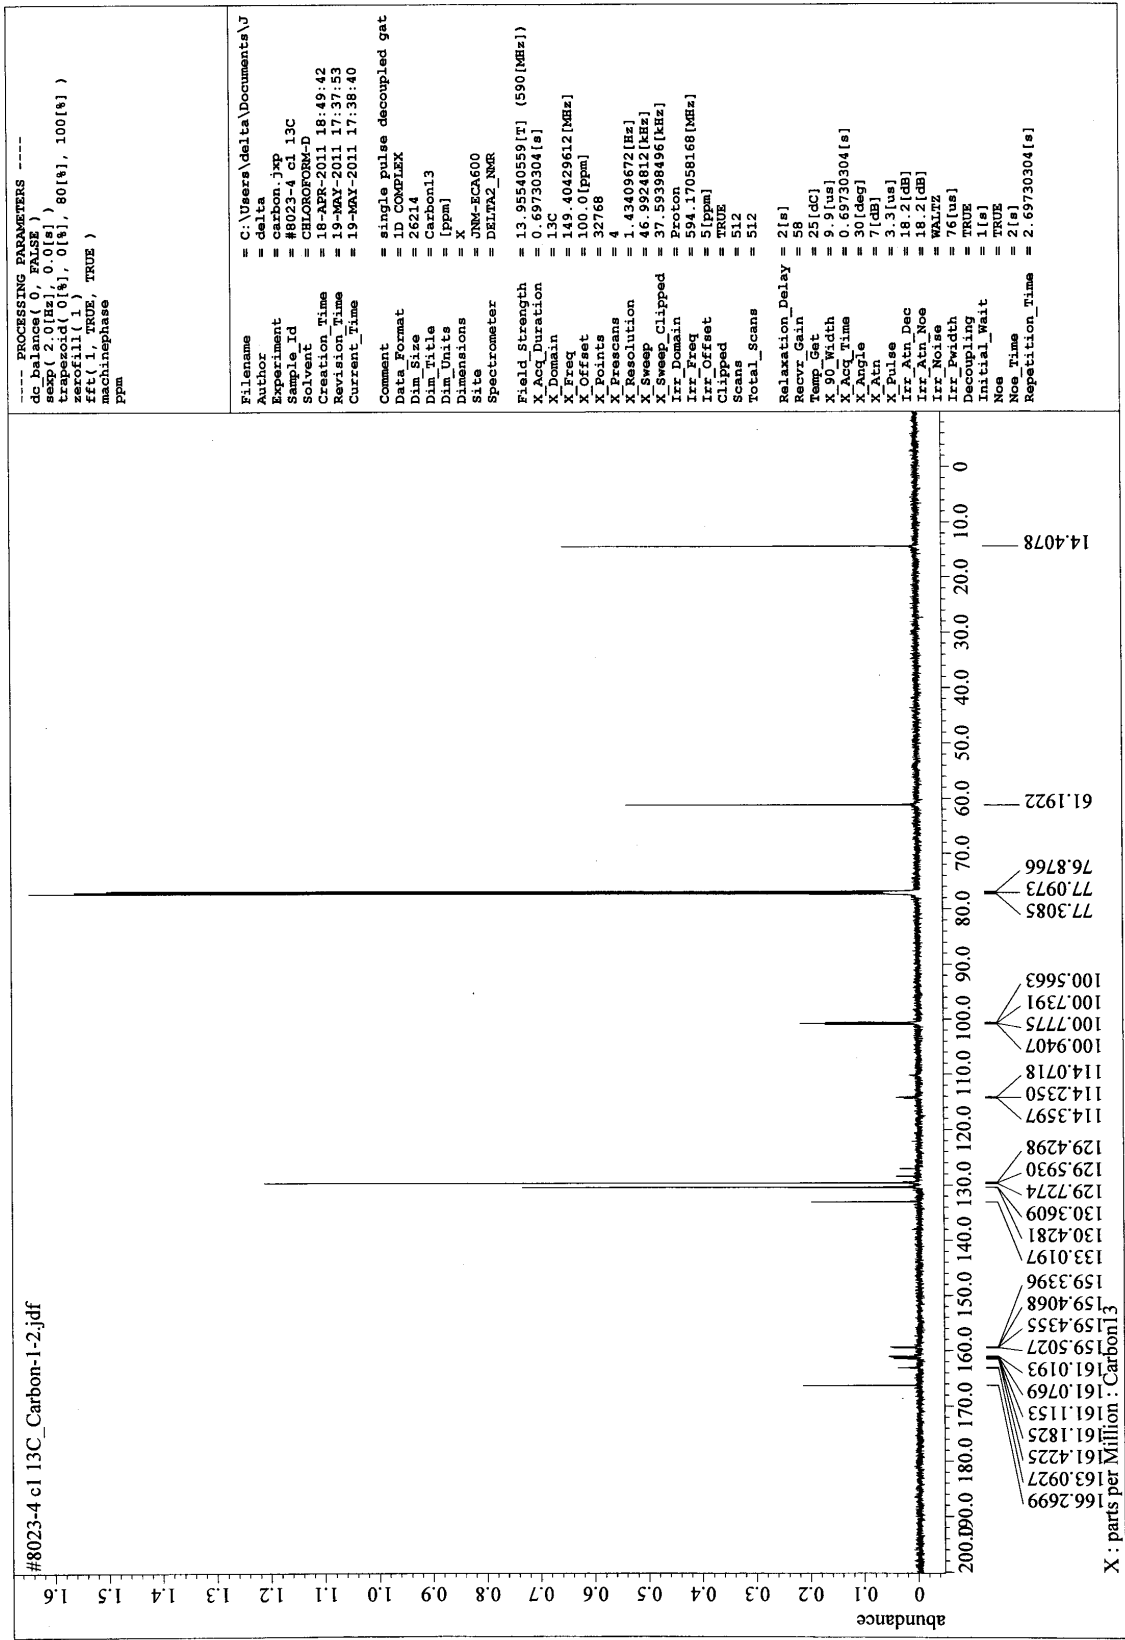

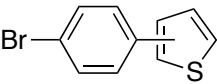

4as

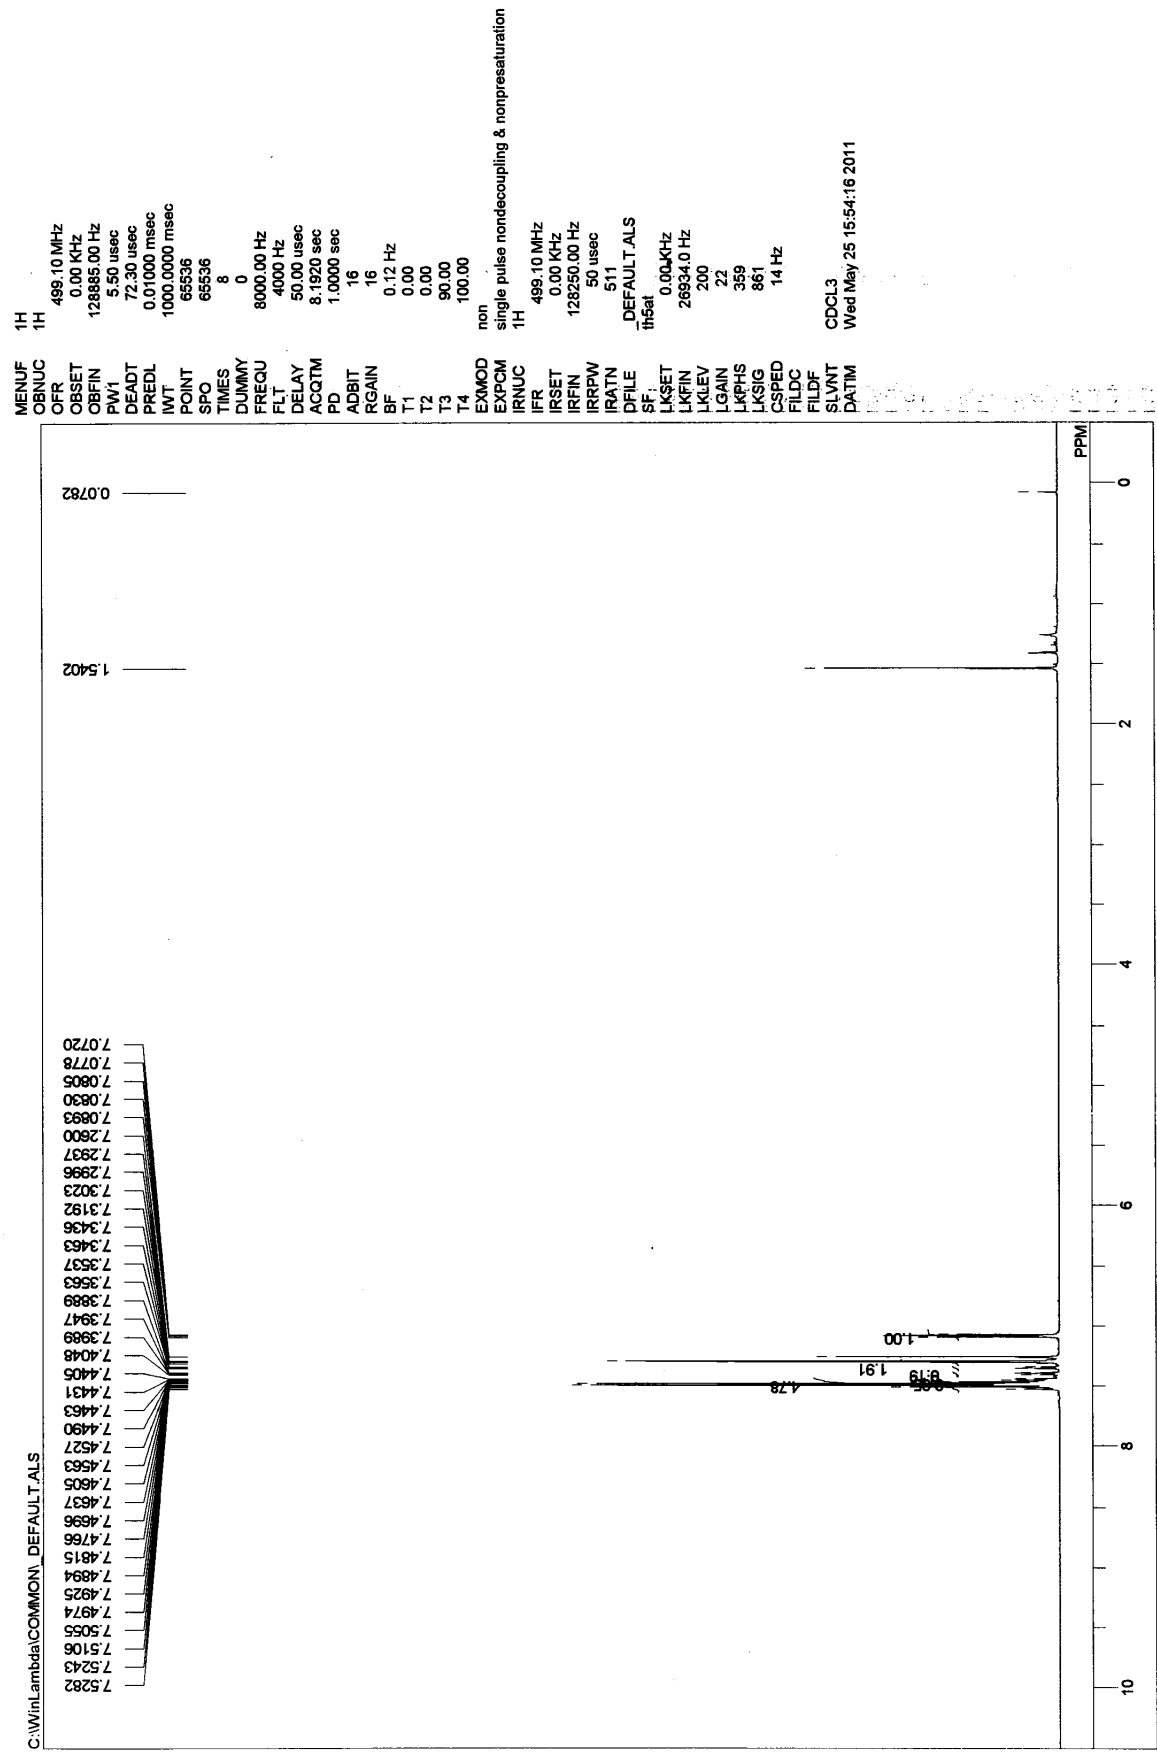

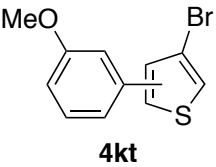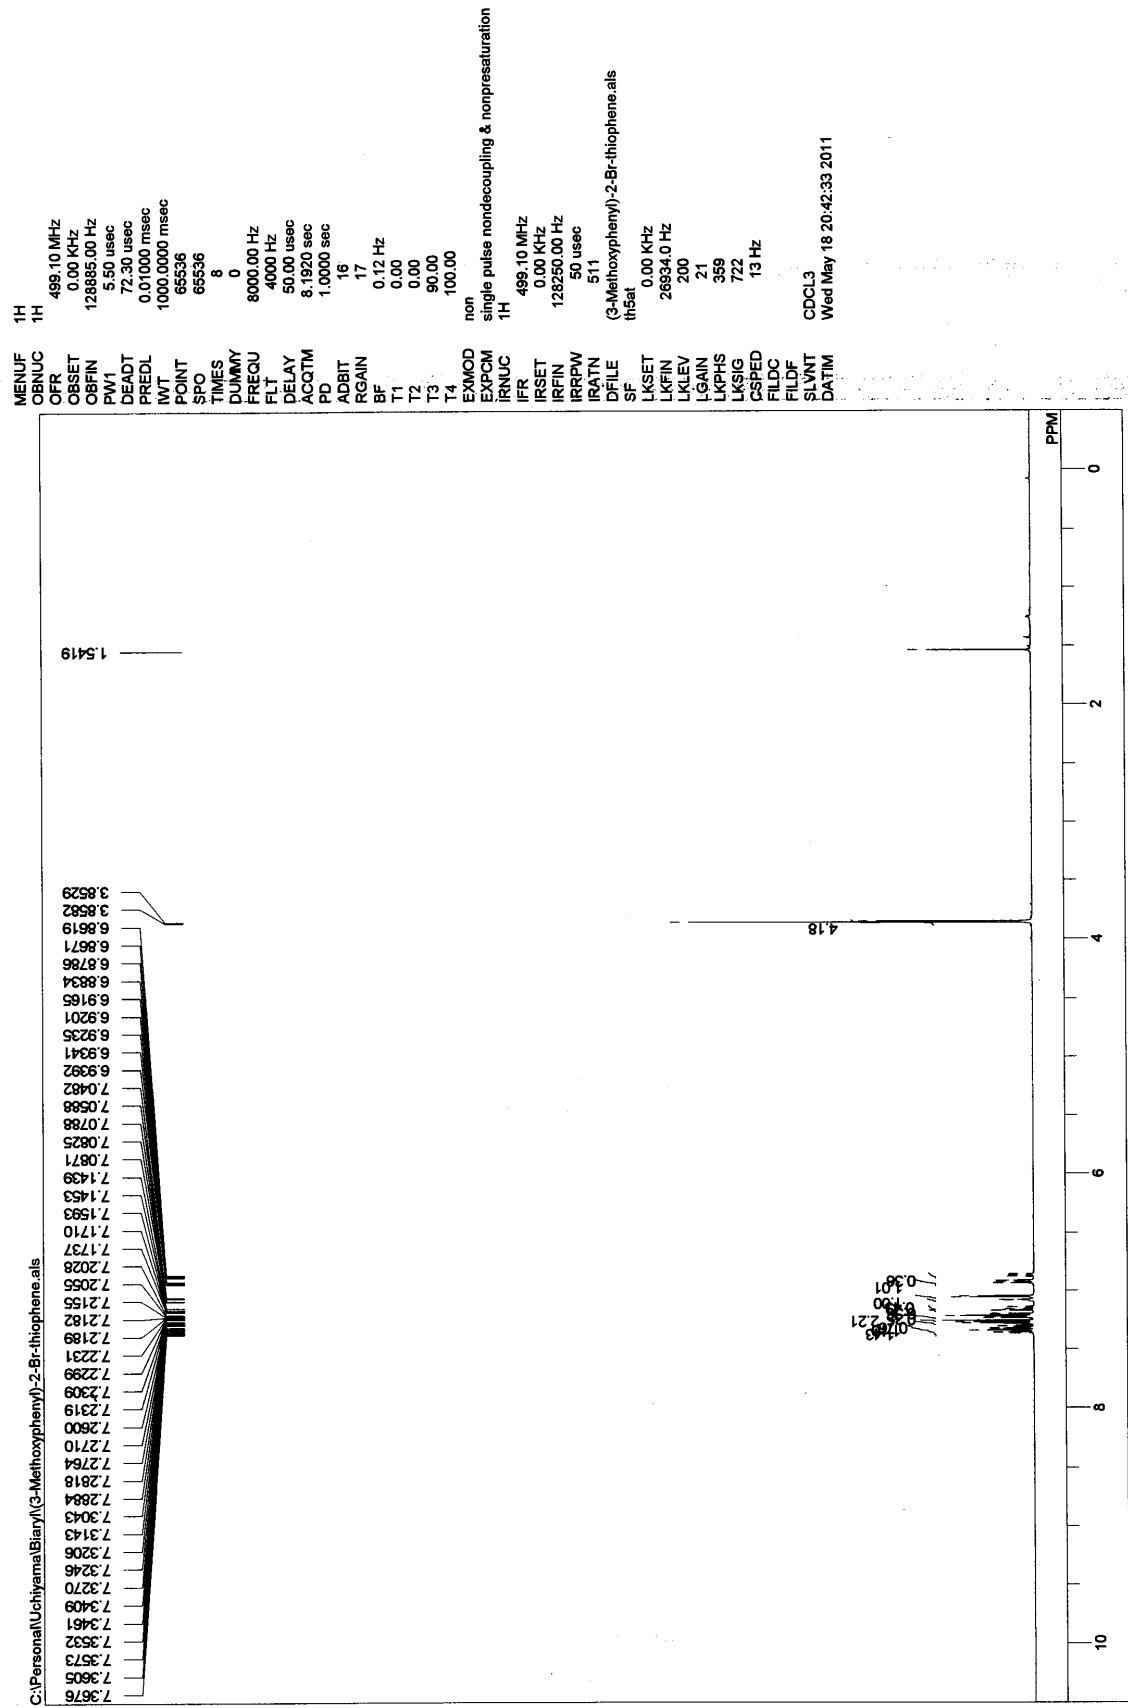

MENUF 1H  
OBNUC 1H  
OFR 499.10 MHz  
OBSET 0.00 KHz  
OBFIN 128885.00 Hz  
PW1 5.50 usec  
DEADT 72.30 usec  
PREDL 0.01000 msec  
IWT 1000.0000 msec  
POINT 65536  
SPO 8  
TIMES 0  
DUMMY 8000.00 Hz  
FREQU 4000 Hz  
FLT 50.00 usec  
DELAY 8.1920 sec  
ACQTM 1.0000 sec  
PD 16  
ADBIT 17  
RGAIN 0.12 Hz  
BF 0.00  
T1 0.00  
T2 90.00  
T3 100.00  
T4 non  
EXMOD single pulse nondecoupling & nonpresaturation  
EXPCM 1H  
IRNUC 499.10 MHz  
IRSET 0.00 KHz  
IRFIN 128250.00 Hz  
IRRPW 50 usec  
IRATN 511  
DFILE (3-Methoxyphenyl)-2-Br-thiophene.als  
SF th5at  
LKSET 0.00 KHz  
LKFIN 26834.0 Hz  
LKLEV 200  
LGAIN 21  
LKPHS 359  
LKSIG 722  
CSPED 13 Hz  
FILDC  
FILDF  
SLVNT CDCL3  
DATIM Wed May 18 20:42:33 2011
